# Supplementary material
Source: MDPI journal article supplement (https://www.mdpi.com/1424-2818/9/3/26)
Supplement: s1 [file s1]

Supplement S2. Trait information for fish and macroinvertebrates used to calculate functional diversity

| Organism C   | Trait Cate  | Trait     | Trait Description                                                        |
|--------------|-------------|-----------|--------------------------------------------------------------------------|
| Fish         | Trophic Ecc | NONFEED   | Adults do not feed.                                                      |
|              |             | BENTHIC   | Benthic feeder.                                                          |
|              |             | SURWCOL   | Surface or water column feeder.                                          |
|              |             | ALGPHTO   | Algae or phytoplankton, including filamentous algae.                     |
|              |             | MACVASCL  | Any part of macrophytes and vascular plants.                             |
|              |             | DETRITUS  | Detritus or unidentifiable vegetative matter.                            |
|              |             | INVLFVSH  | Aquatic and terrestrial invertebrates including zooplankton, insects, n  |
|              |             | FSHCRCRB  | Larger fishes, crayfishes, crabs, frogs, etc.                            |
|              |             | BLOOD     | For parasitic lampreys that feed mainly on blood.                        |
|              |             | EGGS      | Eggs of fishes, frogs, etc.                                              |
|              |             | OTHER     | Other diet components distinct from the preceding classes.               |
| Body Size, I | A_1_1       |           | Nonguarders; Open substratum spawners; Pelagophils.                      |
|              |             | A_1_2     | Nonguarders; Open substratum spawners; Litho-pelagophils.                |
|              |             | A_1_3A    | Nonguarders; Open substratum spawners; Lithophils (rock-gravel).         |
|              |             | A_1_3B    | Nonguarders; Open substratum spawners; Lithophils (gravel-sand).         |
|              |             | A_1_3C    | Nonguarders; Open substratum spawners; Lithophils (silt-mud).            |
|              |             | A_1_4     | Nonguarders; Open substratum spawners; Phyto-lithophils.                 |
|              |             | A_1_5     | Nonguarders; Open substratum spawners; Phytophils.                       |
|              |             | A_1_6     | Nonguarders; Open substratum spawners; Psammophils.                      |
|              |             | A_2_3A    | Nonguarders; Brood hiders; Lithophils (rock-gravel).                     |
|              |             | A_2_3B    | Nonguarders; Brood hiders; Lithophils (gravel-sand).                     |
|              |             | A_2_3C    | Nonguarders; Brood hiders; Lithophils (mud).                             |
|              |             | A_2_4A    | Nonguarders; Brood hiders; Speleophils (rock cavity).                    |
|              |             | A_2_4C    | Brood hiders; Speleophils (cavity generalist rock crevices, and also uni |
|              |             | B_1_3A    | Guarders; Substratum choosers; Lithophils                                |
|              |             | B_1_4     | Guarders; Substratum choosers; Phytophils.                               |
|              |             | B_2_2     | Guarders; Nest spawners; Polyphils.                                      |
|              |             | B_2_3A    | Guarders; Nest spawners; Lithophils (rock-gravel).                       |
|              |             | B_2_3B    | Guarders; Nest spawners; Lithophils (rock-gravel).                       |
|              |             | B_2_4     | Guarders; Nest spawners; Lithophils (gravel-sand).                       |
|              |             | B_2_5     | Guarders; Nest spawners; Ariadnophils.                                   |
|              |             | B_2_6     | Guarders; Nest spawners; Psammophils.                                    |
|              |             | B_2_7A    | Guarders; Nest spawners; Speleophils (rock cavity/roof).                 |
|              |             | B_2_7B    | Guarders; Nest spawners; Speleophils (bottom burrows or natural hol      |
|              |             | B_2_7C    | Guarders; Nest spawners; Speleophils (cavity generalist).                |
|              |             | C1_3_4_C2 | A lumping of all bearers. May also be regarded as substrate-indifferer   |
| Habitat Pre  | MUCK        |           | Muck substrate.                                                          |
|              |             | CLAYSILT  | Clay or silt substrate.                                                  |
|              |             | SAND      | Sand substrate.                                                          |
|              |             | GRAVEL    | Gravel substrate.                                                        |
|              |             | COBBLE    | Cobble or pebble substrate.                                              |
|              |             | BOULDER   | Boulder substrate.                                                       |
|              |             | BEDROCK   | Bedrock substrate.                                                       |
|              |             | VEGETAT   | Aquatic vegetation.                                                      |
|              |             | DEBRDETR  | Organic debris or detrital substrate.                                    |

LWD Large woody debris.  
 PELAGIC Open water.  
 PREFLOT Lotic and lentic systems but more often in lotic.  
 PREFLEN Lotic and lentic systems but more often in lentic.  
 POTANADR Potamodromous or anadromous. Species that exhibit significant movement.  
 LACUSTRIN Lentic systems.  
 LOWLAND Lowland elevation.  
 UPLAND Highland elevation.  
 MONTANE Mountainous physiography.  
 LARGERIV Medium to large river.  
 SMALLRIV Stream to small river.  
 SPRGSUBT Spring or subterranean water  
 CREEK Creek.  
 SLOWCURR Slow current.  
 MODCURR Moderate current.  
 FASTCURR Fast current.

Macroinvertebrate Life history  
 Voltinism 1 Semivoltine (.1 generation/y)  
 Voltinism 2 Univoltine (1 generation/y)  
 Voltinism 3 Bi- or multivoltine (.1 generation/y)  
 Development Fast seasonal  
 Development Slow seasonal  
 Development Nonseasonal  
 Synchronization Poorly synchronized (wk)  
 Synchronization Well synchronized (d)  
 Adult life span Very short (.1 wk)  
 Adult life span Short (.1 mo)  
 Adult life span Long (.1 mo)  
 Adult ability Absent (not including emergence)  
 Adult ability Present  
 Ability to swim Absent  
 Ability to swim Present  
 Mobility  
 Female dispersal Low (.1 km flight before laying eggs)  
 Female dispersal High (.1 km flight before laying eggs)  
 Adult flying Weak (e.g., cannot fly into light breeze)  
 Adult flying Strong  
 Occurrence Rare (catastrophic only)  
 Occurrence Common (typically observed)  
 Occurrence Abundant (dominant in drift samples)  
 Maximum current Very low (.10 cm/h)  
 Maximum current Low (.100 cm/h)  
 Maximum current High (.100 cm/h)  
 Swimming None  
 Swimming Weak  
 Swimming Strong  
 Morphology Attachment None (free-ranging)  
 Attachment Some (sessile, sedentary)  
 Attachment Both

|         |                    |                                                |
|---------|--------------------|------------------------------------------------|
|         | Armoring 1         | None (soft-bodied forms)                       |
|         | Armoring 2         | Poor (heavily sclerotized)                     |
|         | Armoring 3         | Good (e.g., some cased caddisflies)            |
|         | Shape 1            | Streamlined (flat, fusiform)                   |
|         | Shape 2            | Not streamlined (cylindrical, round, or bluff) |
|         | Respiration        | Tegument                                       |
|         | Respiration        | Gills                                          |
|         | Respiration        | Plastron, spiracle (aerial)                    |
|         | Size at mat        | Small (<9 mm)                                  |
|         | Size at mat        | Medium (9–16 mm)                               |
|         | Size at mat        | Large (>16 mm)                                 |
| Ecology | Rheophily 1        | Depositional only                              |
|         | Rheophily 2        | Depositional and erosional                     |
|         | Rheophily 3        | Erosional                                      |
|         | Thermal preference | Cold stenothermal or cool eurythermal          |
|         | Thermal preference | Cool/warm eurythermal                          |
|         | Thermal preference | Warm eurythermal                               |
|         | Habit 1            | Burrow                                         |
|         | Habit 2            | Climb                                          |
|         | Habit 3            | Srawl                                          |
|         | Habit 4            | Cling                                          |
|         | Habit 5            | Swim                                           |
|         | Habit 6            | Skate                                          |
|         | Trophic habit      | Collector-gatherer                             |
|         | Trophic habit      | Collector-filterer                             |
|         | Trophic habit      | Herbivore (scraper, piercer, and shedder)      |
|         | Trophic habit      | Predator (piercer and engulfer)                |
|         | Trophic habit      | Shredder (detritivore)                         |



ement related to spawning. We concentrated on movements between marine and freshwater or within f





freshwater from large river, reservoirs, or lakes to tributary streams.
