# Supplementary material
Source: MDPI journal article supplement (https://www.mdpi.com/1424-2818/9/3/26)
Supplement: s1 [file s1]

Supplement S4. Anova model results from biodiversity-stream size relationships

Anova results for macroinvertebrate communities

| Diversity measure              | Stream size measure | Dataset  | F-statistic | num df | den df | p value  |
|--------------------------------|---------------------|----------|-------------|--------|--------|----------|
| Shannon Diversity              | Strahler order      | MD       | 6.2926484   | 2      | 786    | 0.001944 |
|                                |                     | NC       | 6.8880768   | 5      | 743    | 2.69E-06 |
|                                |                     | cont. US | 47.259087   | 7      | 1916   | 3.93E-62 |
| Functional diversity<br>(RaoQ) | Strahler order      | MD       | 11.756967   | 2      | 786    | 9.31E-06 |
|                                |                     | NC       | 12.891198   | 5      | 741    | 4.85E-12 |
|                                |                     | cont. US | 23.472073   | 7      | 1843   | 1.03E-30 |
| Shannon Diversity              | Watershed area      | MD       | 0.0469721   | 1      | 787    | 0.828475 |
|                                |                     | NC       | 5.6061917   | 1      | 758    | 0.018147 |
|                                |                     | cont. US | 183.97769   | 1      | 1922   | 4.31E-40 |
| Functional diversity<br>(RaoQ) | Watershed area      | MD       | 0.0229001   | 1      | 787    | 0.879756 |
|                                |                     | NC       | 50.460173   | 1      | 750    | 2.83E-12 |
|                                |                     | cont. US | 49.701788   | 1      | 1849   | 2.52E-12 |
| Beta diversity                 | Watershed area      | MD       | 20.007119   | 1      | 51     | 4.34E-05 |
|                                |                     | NC       | 63.340649   | 1      | 204    | 1.19E-13 |
|                                |                     | cont. US | 267.87763   | 1      | 1052   | 8.22E-54 |
| Shannon Diversity              | Stream width        | MD       | 0.0124705   | 1      | 750    | 0.911114 |
|                                |                     | NC       | 31.292993   | 1      | 762    | 3.09E-08 |
|                                |                     | cont. US | 105.29729   | 1      | 1916   | 4.36E-24 |
| Functional diversity<br>(RaoQ) | Stream width        | MD       | 0.0002633   | 1      | 750    | 0.987057 |
|                                |                     | NC       | 35.000901   | 1      | 761    | 4.98E-09 |
|                                |                     | cont. US | 18.397085   | 1      | 1843   | 1.89E-05 |

Anova results for fish communities

| Diversity measure              | Stream size measure | Dataset  | F-statistic | num df | den df | p value   |
|--------------------------------|---------------------|----------|-------------|--------|--------|-----------|
| Shannon Diversity              | Strahler order      | MD       | 197.45915   | 2      | 889    | 1.10E-71  |
|                                |                     | NC       | 6.2605205   | 3      | 411    | 0.000366  |
|                                |                     | cont. US | 51.078833   | 7      | 2115   | 1.63E-67  |
| Functional diversity<br>(RaoQ) | Strahler order      | MD       | 56.292849   | 2      | 836    | 1.16E-23  |
|                                |                     | NC       | 4.546955    | 3      | 411    | 0.003783  |
|                                |                     | cont. US | 27.339916   | 7      | 1820   | 6.62E-36  |
| Shannon Diversity              | Watershed area      | MD       | 757.23121   | 1      | 890    | 4.15E-121 |
|                                |                     | NC       | 27.187904   | 1      | 437    | 2.85E-07  |
|                                |                     | cont. US | 187.794     | 1      | 2120   | 5.11E-41  |
| Functional diversity<br>(RaoQ) | Watershed area      | MD       | 153.3345    | 1      | 837    | 1.86E-32  |
|                                |                     | NC       | 19.96       | 1      | 436    | 1.01E-05  |
|                                |                     | cont. US | 105.0966    | 1      | 1826   | 5.13E-24  |
| Beta diversity                 | Watershed area      | MD       | 0.0197019   | 1      | 51     | 0.888926  |
|                                |                     | NC       | 0.6716366   | 1      | 171    | 0.413622  |
|                                |                     | cont. US | 176.06158   | 1      | 1051   | 2.91E-37  |
| Shannon Diversity              | Stream width        | MD       | 616.80131   | 1      | 889    | 7.75E-104 |
|                                |                     | NC       | 4.8418225   | 1      | 437    | 0.0283    |
|                                |                     | cont. US | 766.67668   | 1      | 2105   | 3.64E-144 |
| Functional diversity<br>(RaoQ) | Stream width        | MD       | 109.09948   | 1      | 837    | 4.33E-24  |
|                                |                     | NC       | 0.3377737   | 1      | 437    | 0.561417  |
|                                |                     | cont. US | 147.71418   | 1      | 1815   | 9.86E-33  |
