# Supplementary material
Source: MDPI journal article supplement (https://www.mdpi.com/1424-2818/9/3/26)
Supplement: s1 [file s1]

Appendix S3. List of taxa missing trait information that were excluded from functional diversity analysis

| Organism |             |                  | Organism |       |                                          |
|----------|-------------|------------------|----------|-------|------------------------------------------|
| Database | Group       | Taxa name        | Database | Group | Taxa name                                |
| USEPA    | Macroinvert | ABEDUS           | USEPA    | Fish  | AMERICAN_BROOK_LAMPREY                   |
| USEPA    | Macroinvert | ACNEUS           | USEPA    | Fish  | AMERICAN_EEL                             |
| USEPA    | Macroinvert | ACRICOTOPUS      | USEPA    | Fish  | APALACHEE_SHINER                         |
| USEPA    | Macroinvert | ACTINOBDELLA     | USEPA    | Fish  | APALACHICOLA_REDHORSE                    |
| USEPA    | Macroinvert | ADICROPHLEPS     | USEPA    | Fish  | ARCTIC_GRAYLING                          |
| USEPA    | Macroinvert | AEDES            | USEPA    | Fish  | ARROW_DARTER                             |
| USEPA    | Macroinvert | AEOLOSOMATIDAE   | USEPA    | Fish  | ATLANTIC_SALMON_JUVENILE                 |
| USEPA    | Macroinvert | AESHNA           | USEPA    | Fish  | ATLANTIC_SILVERSIDE                      |
| USEPA    | Macroinvert | AESHNIDAE        | USEPA    | Fish  | BAY_ANCHOVY                              |
| USEPA    | Macroinvert | AGABETES         | USEPA    | Fish  | BAY_WHIFF                                |
| USEPA    | Macroinvert | AGARODES         | USEPA    | Fish  | BIGMOUTH_SLEEPER                         |
| USEPA    | Macroinvert | AGATHON          | USEPA    | Fish  | BLACK_CARP                               |
| USEPA    | Macroinvert | AGNETINA         | USEPA    | Fish  | BLACKTAIL_SHINER_X_RED_SHINER            |
| USEPA    | Macroinvert | AGRAYLEA         | USEPA    | Fish  | BLOODFIN_DARTER                          |
| USEPA    | Macroinvert | ALBERTATHYAS     | USEPA    | Fish  | BLUE_RIDGE_SCULPIN                       |
| USEPA    | Macroinvert | ALBIA            | USEPA    | Fish  | BLUEFISH                                 |
| USEPA    | Macroinvert | ALBOGLOSSIPHONIA | USEPA    | Fish  | BLUEGILL_HYBRID                          |
| USEPA    | Macroinvert | ALLOCOSMOECUS    | USEPA    | Fish  | BLUEGILL_X_GREEN_SUNFISH                 |
| USEPA    | Macroinvert | ALLOGNOSTA       | USEPA    | Fish  | BLUEGILL_X_ORANGESPOTTED_SUNFISH         |
| USEPA    | Macroinvert | ALLOMYIA         | USEPA    | Fish  | BLUEGILL_X_REDBREAST_SUNFISH             |
| USEPA    | Macroinvert | ALLONAIIS        | USEPA    | Fish  | BLUEHEAD_SUCKER_X_WHITE_SUCKER           |
| USEPA    | Macroinvert | ALMYRACUMA       | USEPA    | Fish  | BLUESIDE_DARTER                          |
| USEPA    | Macroinvert | ALOTANYPUS       | USEPA    | Fish  | BLUESPAR_DARTER                          |
| USEPA    | Macroinvert | AMBRYSUS         | USEPA    | Fish  | BLUESPOTTED_SUNFISH_X_REDSPOTTED_SUNFISH |
| USEPA    | Macroinvert | AMERCAENIS       | USEPA    | Fish  | BONNEVILLE_CUTTHROAT_TROUT               |
| USEPA    | Macroinvert | AMERICAMYSIS     | USEPA    | Fish  | BONYTAIL                                 |
| USEPA    | Macroinvert | AMERICOROPHIUM   | USEPA    | Fish  | BRASSY_JUMPROCK                          |
| USEPA    | Macroinvert | AMETOR           | USEPA    | Fish  | BRIDLE_SHINER                            |
| USEPA    | Macroinvert | AMETROPUS        | USEPA    | Fish  | BRIGHTYE_DARTER                          |
| USEPA    | Macroinvert | AMIOCENTRUS      | USEPA    | Fish  | BRONZE_DARTER                            |
| USEPA    | Macroinvert | AMPHARETIDAE     | USEPA    | Fish  | BROWN_MADTOM                             |

|       |                            |       |      |                                    |
|-------|----------------------------|-------|------|------------------------------------|
| USEPA | Macroinvert AMPHIAGRION    | USEPA | Fish | BULLFROG                           |
| USEPA | Macroinvert AMPHICOSMOECUS | USEPA | Fish | BULLFROG_TADPOLE                   |
| USEPA | Macroinvert AMPHIPODA      | USEPA | Fish | CAHABA_SHINER                      |
| USEPA | Macroinvert AMPUMIXIS      | USEPA | Fish | CARMINE_SHINER                     |
| USEPA | Macroinvert ANABOLIA       | USEPA | Fish | CAROLINA_DARTER                    |
| USEPA | Macroinvert ANACAENA       | USEPA | Fish | CHANNEL_DARTER                     |
| USEPA | Macroinvert ANAGAPETUS     | USEPA | Fish | CHANNEL_SHINER                     |
| USEPA | Macroinvert ANAX           | USEPA | Fish | CHATTAHOOCHEE_SCULPIN              |
| USEPA | Macroinvert ANCHYCTEIS     | USEPA | Fish | CHERRYFIN_SHINER                   |
| USEPA | Macroinvert ANCHYTARSUS    | USEPA | Fish | CHICKASAW_DARTER                   |
| USEPA | Macroinvert ANCYLIDAE      | USEPA | Fish | CHUB_SHINER                        |
| USEPA | Macroinvert ANISOCENTROPUS | USEPA | Fish | CLINCH_SCULPIN                     |
| USEPA | Macroinvert ANOPHELES      | USEPA | Fish | COASTAL_CUTTHROAT_TROUT            |
| USEPA | Macroinvert ANTILLOCLADIUS | USEPA | Fish | COASTRANGE_SCULPIN                 |
| USEPA | Macroinvert APATANIA       | USEPA | Fish | COLORADO_RIVER_CUTTHROAT_TROUT     |
| USEPA | Macroinvert APATANIIDAE    | USEPA | Fish | COMMON_SNOOK                       |
| USEPA | Macroinvert APOBAETIS      | USEPA | Fish | CONGER_EEL                         |
| USEPA | Macroinvert APOCOROPHIUM   | USEPA | Fish | COOSA_CHUB                         |
| USEPA | Macroinvert APTERALIPLUS   | USEPA | Fish | CREEK_CHUB_X_STRIPED_SHINER        |
| USEPA | Macroinvert ARACHNIDA      | USEPA | Fish | CREOLE_DARTER                      |
| USEPA | Macroinvert ARCHILESTES    | USEPA | Fish | CUTBOW                             |
| USEPA | Macroinvert ARCTEONAS      | USEPA | Fish | CUTLIP_MINNOW                      |
| USEPA | Macroinvert ARCTOPSYCHE    | USEPA | Fish | DOLLY_VARDEN                       |
| USEPA | Macroinvert ARGULUS        | USEPA | Fish | DUCK_DARTER                        |
| USEPA | Macroinvert ARIGOMPHUS     | USEPA | Fish | EASTERN_MOSQUITOFISH               |
| USEPA | Macroinvert ARMIGER        | USEPA | Fish | EASTRIM_DARTER                     |
| USEPA | Macroinvert ARRENURIDAE    | USEPA | Fish | EMERALD_DARTER                     |
| USEPA | Macroinvert ARRENURUS      | USEPA | Fish | EULACHON                           |
| USEPA | Macroinvert ASELLIDAE      | USEPA | Fish | FAT_SNOOK                          |
| USEPA | Macroinvert ASHEUM         | USEPA | Fish | FLANNELMOUTH_SUCKER_X_WHITE_SUCKER |
| USEPA | Macroinvert ASIOPLAX       | USEPA | Fish | FRECKLEBELLY_DARTER                |
| USEPA | Macroinvert ASYNARCHUS     | USEPA | Fish | FRESHWATER_GOBY                    |
| USEPA | Macroinvert ATOPSYCHE      | USEPA | Fish | GOLDSTRIPE_DARTER                  |
| USEPA | Macroinvert ATRACTELMIS    | USEPA | Fish | GRASS_PICKEREL                     |

|       |                               |       |      |                                       |
|-------|-------------------------------|-------|------|---------------------------------------|
| USEPA | Macroinvert ATTRACTIDES       | USEPA | Fish | GREEN_SUNFISH_HYBRID                  |
| USEPA | Macroinvert ATRICHOPOGON      | USEPA | Fish | GREEN_SUNFISH_X_LONGEAR_SUNFISH       |
| USEPA | Macroinvert ATTANEURIA        | USEPA | Fish | GREEN_SUNFISH_X_PUMPKINSEED           |
| USEPA | Macroinvert ATTENELLA         | USEPA | Fish | GREEN_SUNFISH_X_REDBREAST_SUNFISH     |
| USEPA | Macroinvert ATURIDAE          | USEPA | Fish | GREEN_SUNFISH_X_WARMOUTH              |
| USEPA | Macroinvert ATURUS            | USEPA | Fish | GREENHEAD_SHINER                      |
| USEPA | Macroinvert AULODRILUS        | USEPA | Fish | GULF_KILLIFISH                        |
| USEPA | Macroinvert AXARUS            | USEPA | Fish | GULF_LOGPERCH                         |
| USEPA | Macroinvert AXONOPSIDAE       | USEPA | Fish | GULF_MENHADEN                         |
| USEPA | Macroinvert BAETIDAE          | USEPA | Fish | HICKORY_SHAD                          |
| USEPA | Macroinvert BAETISCIDAE       | USEPA | Fish | HIGHBACK_CHUB                         |
| USEPA | Macroinvert BAETODES          | USEPA | Fish | HIGHLAND_SHINER                       |
| USEPA | Macroinvert BANKSIOLA         | USEPA | Fish | HOGCHOKER                             |
| USEPA | Macroinvert BATRACOBDELLA     | USEPA | Fish | HYBRID_COLORADO_RIVER_CUTTHROAT_TROUT |
| USEPA | Macroinvert BEARDIUS          | USEPA | Fish | HYBRID_LEPOMIS                        |
| USEPA | Macroinvert BECKIDIA          | USEPA | Fish | HYBRID_MINNOW                         |
| USEPA | Macroinvert BELOSTOMATIDAE    | USEPA | Fish | HYBRID_SUNFISH                        |
| USEPA | Macroinvert BEOTHUKUS         | USEPA | Fish | KANAWHA_SCULPIN                       |
| USEPA | Macroinvert BEROSUS           | USEPA | Fish | KENTUCKY_DARTER                       |
| USEPA | Macroinvert BETHBILBECKIA     | USEPA | Fish | LADYFISH                              |
| USEPA | Macroinvert BIBIOCEPHALA      | USEPA | Fish | LAHONTAN_CUTTHROAT_TROUT              |
| USEPA | Macroinvert BIOMPHALARIA      | USEPA | Fish | LAHONTAN_SUCKER                       |
| USEPA | Macroinvert BITTACOMORPHA     | USEPA | Fish | LAMPREY_AMMOCOETE                     |
| USEPA | Macroinvert BIVALVIA          | USEPA | Fish | LARGESCALED_SPINYCHEEK_SLEEPER        |
| USEPA | Macroinvert BLEPHARICERIDAE   | USEPA | Fish | LARGESPRING_GAMBUSIA                  |
| USEPA | Macroinvert BOLSHECAPNIA      | USEPA | Fish | LEAST_BROOK_LAMPREY                   |
| USEPA | Macroinvert BOREOCHLUS        | USEPA | Fish | LEATHERSIDE_CHUB                      |
| USEPA | Macroinvert BOREOHEPTAGYIA    | USEPA | Fish | LINED_CHUB                            |
| USEPA | Macroinvert BOTHRIONEURUM     | USEPA | Fish | LITTLE_COLORADO_RIVER_SUCKER          |
| USEPA | Macroinvert BRACHYCENTRIDAE   | USEPA | Fish | LONGFIN_DARTER                        |
| USEPA | Macroinvert BRACHYCERCUS      | USEPA | Fish | LONGJAW_MINNOW                        |
| USEPA | Macroinvert BRANCHIOBDELLIDA  | USEPA | Fish | LONGNOSE_SUCKER_X_WHITE_SUCKER        |
| USEPA | Macroinvert BRANCHIOBDELLIDAE | USEPA | Fish | LOWLAND_SHINER                        |
| USEPA | Macroinvert BRANCHIODRILUS    | USEPA | Fish | MARbled_SCULPIN                       |

|       |                               |       |      |                                      |
|-------|-------------------------------|-------|------|--------------------------------------|
| USEPA | Macroinvert BRANCHIURA        | USEPA | Fish | MAYAN_CICHLID                        |
| USEPA | Macroinvert BRATISLAVIA       | USEPA | Fish | MIRROR_CARP                          |
| USEPA | Macroinvert BRECHMORHOGA      | USEPA | Fish | MISSISSIPPI_SILVERSIDE               |
| USEPA | Macroinvert BRUNDINIELLA      | USEPA | Fish | MOTTLED_SCULPIN                      |
| USEPA | Macroinvert BRYCHIUS          | USEPA | Fish | MOUNTAIN_BROOK_LAMPREY               |
| USEPA | Macroinvert BRYOPHAENOCLADIUS | USEPA | Fish | NO_FISH                              |
| USEPA | Macroinvert BULIMNAEA         | USEPA | Fish | NORTHERN_BROOK_LAMPREY               |
| USEPA | Macroinvert CAECIDOTEA        | USEPA | Fish | NORTHERN_MADTOM                      |
| USEPA | Macroinvert CAENIDAE          | USEPA | Fish | NOTCHLIP_REDHORSE                    |
| USEPA | Macroinvert CALINEURIA        | USEPA | Fish | NUECES_ROUNDNOSE_MINNOW              |
| USEPA | Macroinvert CALOPARYPHUS      | USEPA | Fish | OHIO_LAMPREY                         |
| USEPA | Macroinvert CALOPTERYGIDAE    | USEPA | Fish | ORANGEBELLY_DARTER                   |
| USEPA | Macroinvert CAMBARIDAE        | USEPA | Fish | ORANGEFIN_DARTER                     |
| USEPA | Macroinvert CAMBARINCOLIDAE   | USEPA | Fish | ORINOCO_SAILFIN_CATFISH              |
| USEPA | Macroinvert CAMBARUS          | USEPA | Fish | OZARK_CHUB                           |
| USEPA | Macroinvert CAMELOBAETIDIUS   | USEPA | Fish | PACIFIC_GIANT_SALAMANDER             |
| USEPA | Macroinvert CAMPELOMA         | USEPA | Fish | PEALIP_REDHORSE                      |
| USEPA | Macroinvert CAMPTOCLADIUS     | USEPA | Fish | PEAMOUTH                             |
| USEPA | Macroinvert CAPITELLIDAE      | USEPA | Fish | PLAINS/WESTERN_SILVERY_MINNOW        |
| USEPA | Macroinvert CAPNIIDAE         | USEPA | Fish | PLATEAU_SHINER                       |
| USEPA | Macroinvert CASSIDINIDEA      | USEPA | Fish | PRAIRIE_CHUB                         |
| USEPA | Macroinvert CAUDATELLA        | USEPA | Fish | PRICKLY_SCULPIN                      |
| USEPA | Macroinvert CELINA            | USEPA | Fish | PUMPKINSEED_X_REDBREAST_SUNFISH      |
| USEPA | Macroinvert CELITHEMIS        | USEPA | Fish | RAINBOW_SMELT                        |
| USEPA | Macroinvert CENTROLIMNESIA    | USEPA | Fish | RAINBOW_TROUT_(STEELHEAD)            |
| USEPA | Macroinvert CERATOPOGONINAE   | USEPA | Fish | RED_DRUM                             |
| USEPA | Macroinvert CERCOBRACHYS      | USEPA | Fish | RED_RIVER_PUPFISH                    |
| USEPA | Macroinvert CERNOTINA         | USEPA | Fish | RED_RIVER_SHINER                     |
| USEPA | Macroinvert CHAETARTHRIA      | USEPA | Fish | REDBAND_RAINBOW_TROUT                |
| USEPA | Macroinvert CHAETOGASTER      | USEPA | Fish | RED-LEGGED_FROG                      |
| USEPA | Macroinvert CHAOBORUS         | USEPA | Fish | REDLIP_SHINER                        |
| USEPA | Macroinvert CHAULIODES        | USEPA | Fish | REDSPOT_DARTER                       |
| USEPA | Macroinvert CHEILOTRICHIA     | USEPA | Fish | REDSPOTTED_SUNFISH_X_SPOTTED_SUNFISH |
| USEPA | Macroinvert CHERNOVSKIIA      | USEPA | Fish | RIVER_GOBY                           |

|       |                                     |       |      |                        |
|-------|-------------------------------------|-------|------|------------------------|
| USEPA | Macroinvert CHIRIDOTEA              | USEPA | Fish | RIVERWEED_DARTER       |
| USEPA | Macroinvert CHIRONOMIDAE            | USEPA | Fish | ROANOKE_HOG_SUCKER     |
| USEPA | Macroinvert CHLOROPERLIDAE          | USEPA | Fish | ROUGH-SKINNED_NEWT     |
| USEPA | Macroinvert CHLOROTABANUS           | USEPA | Fish | SADDLEBACK_DARTER      |
| USEPA | Macroinvert CHOROTERPES             | USEPA | Fish | SADDLED_MADTOM         |
| USEPA | Macroinvert CHROMAGRION             | USEPA | Fish | SAUGEYE                |
| USEPA | Macroinvert CHRYSOMELIDAE           | USEPA | Fish | SAWFIN_SHINER          |
| USEPA | Macroinvert CHRYSOPS                | USEPA | Fish | SHEEPSHEAD_MINNOW      |
| USEPA | Macroinvert CHYRANDRA               | USEPA | Fish | SHOAL_CHUB             |
| USEPA | Macroinvert CINYGMA                 | USEPA | Fish | SICKLEFIN_CHUB         |
| USEPA | Macroinvert CLAASSENIA              | USEPA | Fish | SILVER_CARP            |
| USEPA | Macroinvert CLATHROSPERCHON         | USEPA | Fish | SLIM_MINNOW            |
| USEPA | Macroinvert CLATHROSPERCHONIDAE     | USEPA | Fish | SMALLFIN_REDHORSE      |
| USEPA | Macroinvert CLEPTELMIS              | USEPA | Fish | SMALLMOUTH_REDHORSE    |
| USEPA | Macroinvert CLOODES                 | USEPA | Fish | SNAKEHEAD              |
| USEPA | Macroinvert CLOEON                  | USEPA | Fish | SOUTHERN_BROOK_LAMPREY |
| USEPA | Macroinvert CNIDARIA                | USEPA | Fish | SOUTHERN_FLOUNDER      |
| USEPA | Macroinvert COELOTANYPUS            | USEPA | Fish | SPECKLED_KILLIFISH     |
| USEPA | Macroinvert COENAGRIONIDAE          | USEPA | Fish | SPECKLED_WORM_EEL      |
| USEPA | Macroinvert COLEOPTERA              | USEPA | Fish | SPLENDID_DARTER        |
| USEPA | Macroinvert COLLEMBOLA              | USEPA | Fish | SPOT                   |
| USEPA | Macroinvert CONSTEMPELLINA          | USEPA | Fish | STARGAZING_DARTER      |
| USEPA | Macroinvert COPELATUS               | USEPA | Fish | STRAWBERRY_DARTER      |
| USEPA | Macroinvert COPTOTOMUS              | USEPA | Fish | STRIPEBACK_DARTER      |
| USEPA | Macroinvert CORBICULA               | USEPA | Fish | STRIPED_DARTER         |
| USEPA | Macroinvert CORDULIIDAE             | USEPA | Fish | STRIPED_MULLET         |
| USEPA | Macroinvert COROPHIIDAE             | USEPA | Fish | TADPOLE                |
| USEPA | Macroinvert CORTICACARUS            | USEPA | Fish | TAILED_FROG            |
| USEPA | Macroinvert CORYDALIDAE             | USEPA | Fish | TAILED_FROG_(TADPOLE)  |
| USEPA | Macroinvert CRAMBIDAE               | USEPA | Fish | TALLAPOOSA_DARTER      |
| USEPA | Macroinvert CRANGONYX               | USEPA | Fish | TALLAPOOSA_SCULPIN     |
| USEPA | Macroinvert CRICOTOPUS/ORTHOCLADIUS | USEPA | Fish | TALLAPOOSA_SHINER      |
| USEPA | Macroinvert CRYPTOCHIA              | USEPA | Fish | TEARDROP_DARTER        |
| USEPA | Macroinvert CRYPTOLABIS             | USEPA | Fish | TENNESSEE_DARTER       |

|       |                                  |
|-------|----------------------------------|
| USEPA | Macroinvert CRYPTOTENDIPES       |
| USEPA | Macroinvert CULEX                |
| USEPA | Macroinvert CULICIDAE            |
| USEPA | Macroinvert CULOPTILA            |
| USEPA | Macroinvert CURCULIONIDAE        |
| USEPA | Macroinvert CYATHURA             |
| USEPA | Macroinvert CYBISTER             |
| USEPA | Macroinvert CYMBIODYTA           |
| USEPA | Macroinvert CYPHOMELLA           |
| USEPA | Macroinvert CYPHON               |
| USEPA | Macroinvert CYRNELLUS            |
| USEPA | Macroinvert DANNELLA             |
| USEPA | Macroinvert DASYHELEA            |
| USEPA | Macroinvert DECAPODA             |
| USEPA | Macroinvert DEMEIJEREA           |
| USEPA | Macroinvert DEMICRYPTOCHIRONOMUS |
| USEPA | Macroinvert DERALLUS             |
| USEPA | Macroinvert DERO                 |
| USEPA | Macroinvert DEROTANYPUS          |
| USEPA | Macroinvert DESMONA              |
| USEPA | Macroinvert DESPAXIA             |
| USEPA | Macroinvert DESSEROBDELLA        |
| USEPA | Macroinvert DEUTEROPHLEBIA       |
| USEPA | Macroinvert DIACHLORUS           |
| USEPA | Macroinvert DICOSMOECUS          |
| USEPA | Macroinvert DIDYMOPS             |
| USEPA | Macroinvert DINEUTUS             |
| USEPA | Macroinvert DIPTERA              |
| USEPA | Macroinvert DIURA                |
| USEPA | Macroinvert DIXA                 |
| USEPA | Macroinvert DIXELLA              |
| USEPA | Macroinvert DIXIDAE              |
| USEPA | Macroinvert DJALMABATISTA        |
| USEPA | Macroinvert DOLICHOPODIDAE       |

|       |      |                        |
|-------|------|------------------------|
| USEPA | Fish | THINLIP_CHUB           |
| USEPA | Fish | THREESPINE_STICKLEBACK |
| USEPA | Fish | TIGER_MUSKELLUNGE      |
| USEPA | Fish | TIGER_TROUT            |
| USEPA | Fish | TOMBIGBEE_DARTER       |
| USEPA | Fish | TROUT-PERCH            |
| USEPA | Fish | TULE_PERCH             |
| USEPA | Fish | UMATILLA_DACE          |
| USEPA | Fish | UNKNOWN                |
| USEPA | Fish | UNKNOWN_AMEIURUS       |
| USEPA | Fish | UNKNOWN_AMMOCRYPTA     |
| USEPA | Fish | UNKNOWN_BASS           |
| USEPA | Fish | UNKNOWN_CAMPOSTOMA     |
| USEPA | Fish | UNKNOWN_CARPIODES      |
| USEPA | Fish | UNKNOWN_CATOSTOMUS     |
| USEPA | Fish | UNKNOWN_CICHLID        |
| USEPA | Fish | UNKNOWN_COTTUS         |
| USEPA | Fish | UNKNOWN_CYPRINELLA     |
| USEPA | Fish | UNKNOWN_ESOX           |
| USEPA | Fish | UNKNOWN_ETHEOSTOMA     |
| USEPA | Fish | UNKNOWN_FUNDULUS       |
| USEPA | Fish | UNKNOWN_GAMBUSIA       |
| USEPA | Fish | UNKNOWN_GOBY           |
| USEPA | Fish | UNKNOWN_HERRING        |
| USEPA | Fish | UNKNOWN_HYBOGNATHUS    |
| USEPA | Fish | UNKNOWN_HYBOPSIS       |
| USEPA | Fish | UNKNOWN_ICHTHYOMYZON   |
| USEPA | Fish | UNKNOWN_LAMPREY        |
| USEPA | Fish | UNKNOWN_LEPISOSTEUS    |
| USEPA | Fish | UNKNOWN_LEPOMIS        |
| USEPA | Fish | UNKNOWN_LORICARIIDAE   |
| USEPA | Fish | UNKNOWN_MINNOW         |
| USEPA | Fish | UNKNOWN_MORONE         |
| USEPA | Fish | UNKNOWN_MOXOSTOMA      |

|       |                              |
|-------|------------------------------|
| USEPA | Macroinvert DORONEURIA       |
| USEPA | Macroinvert DREISSENA        |
| USEPA | Macroinvert DRYOPIDAE        |
| USEPA | Macroinvert DYTISCIDAE       |
| USEPA | Macroinvert DYTISCUS         |
| USEPA | Macroinvert ECCLISOCOSMOECUS |
| USEPA | Macroinvert ECCLISOMYIA      |
| USEPA | Macroinvert ECDYONURUS       |
| USEPA | Macroinvert ECHINOGAMMARUS   |
| USEPA | Macroinvert ECLIPIDRILUS     |
| USEPA | Macroinvert ECTEMNIA         |
| USEPA | Macroinvert EDOTIA           |
| USEPA | Macroinvert EINFELDIA        |
| USEPA | Macroinvert ELIMIA           |
| USEPA | Macroinvert ELLIPTIO         |
| USEPA | Macroinvert ENCHYTRAEIDAE    |
| USEPA | Macroinvert ENDOTRIBELOS     |
| USEPA | Macroinvert ENOCHRUS         |
| USEPA | Macroinvert EOBRACHYCENTRUS  |
| USEPA | Macroinvert EOCOSMOECUS      |
| USEPA | Macroinvert EPHEMERELLIDAE   |
| USEPA | Macroinvert EPHEMERIDAE      |
| USEPA | Macroinvert EPHEMEROPTERA    |
| USEPA | Macroinvert EPHORON          |
| USEPA | Macroinvert EPHYDRA          |
| USEPA | Macroinvert EPHYDRIDAE       |
| USEPA | Macroinvert EPIAESCHNA       |
| USEPA | Macroinvert EPITHECA         |
| USEPA | Macroinvert EPOICOCLADIUS    |
| USEPA | Macroinvert ERIOPTERA        |
| USEPA | Macroinvert ERPOBDELLA       |
| USEPA | Macroinvert ERPOBDELLIDAE    |
| USEPA | Macroinvert ERYTHEMIS        |
| USEPA | Macroinvert ESTELLOXUS       |

|       |      |                           |
|-------|------|---------------------------|
| USEPA | Fish | UNKNOWN_NOTROPIS          |
| USEPA | Fish | UNKNOWN_NOTURUS           |
| USEPA | Fish | UNKNOWN_PHOXINUS          |
| USEPA | Fish | UNKNOWN_SALAMANDER        |
| USEPA | Fish | UNKNOWN_SILVERSIDE        |
| USEPA | Fish | UNKNOWN_SUCKER            |
| USEPA | Fish | UNKNOWN_TEMPERATE_BASS    |
| USEPA | Fish | UNKNOWN_TROUT             |
| USEPA | Fish | UTAH_CHUB                 |
| USEPA | Fish | V-LIP_REDHORSE            |
| USEPA | Fish | WESTERN_BLACKNOSE_DACE    |
| USEPA | Fish | WESTERN_BROOK_LAMPREY     |
| USEPA | Fish | WESTERN_TOAD              |
| USEPA | Fish | WESTRIM_DARTER            |
| USEPA | Fish | WESTSLOPE_CUTTHROAT_TROUT |
| USEPA | Fish | WHITE_MULLET              |
| USEPA | Fish | WIPER                     |
| USEPA | Fish | YAZOO_SHINER              |
| USEPA | Fish | YELLOWFIN_GOBY            |
| USEPA | Fish | YELLOWFIN_MOJARRA         |
| MBSS  | Fish | AMERICAN_EEL              |
| MBSS  | Fish | LEPOMIS_HYBRID            |
| MBSS  | Fish | BLUE_RIDGE_SCULPIN        |
| MBSS  | Fish | CYPRINID_UNKNOWN          |
| MBSS  | Fish | ALEWIFE                   |
| MBSS  | Fish | NOTROPIS_SP               |
| MBSS  | Fish | CYPRINID_HYBRID           |
| MBSS  | Fish | LAMPREY_UNKNOWN           |
| MBSS  | Fish | SCULPIN_UNKNOWN           |
| MBSS  | Fish | CYPRINELLA_SP             |
| MBSS  | Fish | AMERICAN_SHAD             |
| MBSS  | Fish | DARTER_UNKNOWN            |
| MBSS  | Fish | BULLHEAD_UNKNOWN          |
| MBSS  | Fish | LUXILIS_SP                |

|       |                              |       |      |                                    |
|-------|------------------------------|-------|------|------------------------------------|
| USEPA | Macroinvert EUBRIANAX        | MBSS  | Fish | SUNFISH_UNKNOWN                    |
| USEPA | Macroinvert EUPARYPHUS       | MBSS  | Fish | INLAND_SILVERSIDE                  |
| USEPA | Macroinvert EUPERA           | MBSS  | Fish | BLUEBACK_HERRING                   |
| USEPA | Macroinvert EURYHAPSIS       | MBSS  | Fish | SUNFISH_HYBRID                     |
| USEPA | Macroinvert EYLAIDAE         | NCBMP | Fish | SCARTOMYZON_RUPISCARTES            |
| USEPA | Macroinvert EYLAIS           | NCBMP | Fish | MOXOSTOMA_COLLAPSUM                |
| USEPA | Macroinvert FALLCEON         | NCBMP | Fish | SCARTOMYZON_SP._CF._LACHNERI       |
| USEPA | Macroinvert FALLICAMBARUS    | NCBMP | Fish | ETHEOSTOMA_BREVISPINUM             |
| USEPA | Macroinvert FARULA           | NCBMP | Fish | CHROSOMUS_OREAS                    |
| USEPA | Macroinvert FATTIGIA         | NCBMP | Fish | ETHEOSTOMA_GUTSELLI                |
| USEPA | Macroinvert FAXONELLA        | NCBMP | Fish | LEPOMIS_SP.                        |
| USEPA | Macroinvert FELTRIA          | NCBMP | Fish | RHINICHTHYS_OBTUSUS                |
| USEPA | Macroinvert FERRISSIA        | NCBMP | Fish | ANGUILLA_ROSTRATA                  |
| USEPA | Macroinvert FISSIMENTUM      | NCBMP | Fish | ETHEOSTOMA_SP._CF._NIGRUM/OLMSTEDI |
| USEPA | Macroinvert FITTKAUIMYIA     | NCBMP | Fish | PERCINA_NEVISENSE                  |
| USEPA | Macroinvert FORCIPOMYIA      | NCBMP | Fish | NOTROPIS_SP._CF._CHLOROCEPHALUS    |
| USEPA | Macroinvert FORELIA          | NCBMP | Fish | NOTROPIS_SP._CF._RUBELLUS          |
| USEPA | Macroinvert FOSSARIA         | NCBMP | Fish | CLINOSTOMUS_SP._CF._FUNDULOIDES    |
| USEPA | Macroinvert FRISONIA         | NCBMP | Fish | MOXOSTOMA_SP._CF._CARINATUM        |
| USEPA | Macroinvert FRONTIPODA       | NCBMP | Fish | NOTROPIS_MICROPTERYX               |
| USEPA | Macroinvert GAMMARIDAE       | NCBMP | Fish | SCARTOMYZON_ARIOMMUS               |
| USEPA | Macroinvert GAMMARUS         | NCBMP | Fish | DOROSOMA_PETENENSE                 |
| USEPA | Macroinvert GASTROPODA       |       |      |                                    |
| USEPA | Macroinvert GEAYIA           |       |      |                                    |
| USEPA | Macroinvert GILLOTIA         |       |      |                                    |
| USEPA | Macroinvert GLOIOBELLA       |       |      |                                    |
| USEPA | Macroinvert GLOSSIPHONIA     |       |      |                                    |
| USEPA | Macroinvert GLOSSIPHONIIDAE  |       |      |                                    |
| USEPA | Macroinvert GLOSSOSOMATIDAE  |       |      |                                    |
| USEPA | Macroinvert GLUTOPS          |       |      |                                    |
| USEPA | Macroinvert GLYPHOPSYCHE     |       |      |                                    |
| USEPA | Macroinvert GOELDICHIRONOMUS |       |      |                                    |
| USEPA | Macroinvert GOMPHIDAE        |       |      |                                    |
| USEPA | Macroinvert GONIDEA          |       |      |                                    |



|       |                               |
|-------|-------------------------------|
| USEPA | Macroinvert GONIOBASIS        |
| USEPA | Macroinvert GONOMYIA          |
| USEPA | Macroinvert GRANDIDIERELLA    |
| USEPA | Macroinvert GUMAGA            |
| USEPA | Macroinvert GUTTIPELOPIA      |
| USEPA | Macroinvert GYMNOCHTHEBIUS    |
| USEPA | Macroinvert GYMNOMETRIOCNEMUS |
| USEPA | Macroinvert GYRAULUS          |
| USEPA | Macroinvert GYRETES           |
| USEPA | Macroinvert GYRINIDAE         |
| USEPA | Macroinvert GYRINUS           |
| USEPA | Macroinvert HABROPHLEBIODES   |
| USEPA | Macroinvert HAEMONAIS         |
| USEPA | Macroinvert HALIPLIDAE        |
| USEPA | Macroinvert HALIPLUS          |
| USEPA | Macroinvert HAPLOTAXIDA       |
| USEPA | Macroinvert HAPLOTAXIS        |
| USEPA | Macroinvert HARNISCHIA        |
| USEPA | Macroinvert HEBETONCYLUS      |
| USEPA | Macroinvert HELICOPSYCHE      |
| USEPA | Macroinvert HELISOMA          |
| USEPA | Macroinvert HELIUS            |
| USEPA | Macroinvert HELOBDELLA        |
| USEPA | Macroinvert HELOCHARES        |
| USEPA | Macroinvert HELOCORDULIA      |
| USEPA | Macroinvert HELODON           |
| USEPA | Macroinvert HELOPHORUS        |
| USEPA | Macroinvert HEPTAGENIIDAE     |
| USEPA | Macroinvert HESPEROCONOPA     |
| USEPA | Macroinvert HESPEROPERLA      |
| USEPA | Macroinvert HESPEROPHYLAX     |
| USEPA | Macroinvert HETAERINA         |
| USEPA | Macroinvert HETERELMIS        |
| USEPA | Macroinvert HETERLIMNIUS      |

|       |                              |
|-------|------------------------------|
| USEPA | Macroinvert HETEROCERIDAE    |
| USEPA | Macroinvert HETEROCLOEON     |
| USEPA | Macroinvert HETEROTANYTARSUS |
| USEPA | Macroinvert HEXACYLLOEPUS    |
| USEPA | Macroinvert HIRUDINEA        |
| USEPA | Macroinvert HOMOEONEURIA     |
| USEPA | Macroinvert HOMOLEPTOHYPHES  |
| USEPA | Macroinvert HYALELLA         |
| USEPA | Macroinvert HYALELLIDAE      |
| USEPA | Macroinvert HYBOMITRA        |
| USEPA | Macroinvert HYDATICUS        |
| USEPA | Macroinvert HYDRACHNA        |
| USEPA | Macroinvert HYDRACHNIDAE     |
| USEPA | Macroinvert HYDRAENA         |
| USEPA | Macroinvert HYDRELLIA        |
| USEPA | Macroinvert HYDROBIIDAE      |
| USEPA | Macroinvert HYDROBIUS        |
| USEPA | Macroinvert HYDROCANTHUS     |
| USEPA | Macroinvert HYDROCHARA       |
| USEPA | Macroinvert HYDROCHUS        |
| USEPA | Macroinvert HYDROCOLUS       |
| USEPA | Macroinvert HYDRODROMA       |
| USEPA | Macroinvert HYDRODROMIDAE    |
| USEPA | Macroinvert HYDROPHILIDAE    |
| USEPA | Macroinvert HYDROPHILUS      |
| USEPA | Macroinvert HYDROPSYCHIDAE   |
| USEPA | Macroinvert HYDROPTILIDAE    |
| USEPA | Macroinvert HYDROVATUS       |
| USEPA | Macroinvert HYDROVOLZIA      |
| USEPA | Macroinvert HYDROZETIDAE     |
| USEPA | Macroinvert HYDRYPHANTES     |
| USEPA | Macroinvert HYDRYPHANTIDAE   |
| USEPA | Macroinvert HYGROBATES       |
| USEPA | Macroinvert HYGROBATIDAE     |

|       |                              |
|-------|------------------------------|
| USEPA | Macroinvert HYGROTUS         |
| USEPA | Macroinvert HYPORHYGMA       |
| USEPA | Macroinvert ILYBIUS          |
| USEPA | Macroinvert ILYODRILUS       |
| USEPA | Macroinvert IRNODES          |
| USEPA | Macroinvert IRONOQUIA        |
| USEPA | Macroinvert ISOCHAETIDES     |
| USEPA | Macroinvert ISOGENOIDES      |
| USEPA | Macroinvert ISOPODA          |
| USEPA | Macroinvert ISWAEON          |
| USEPA | Macroinvert ITHYTRICHIA      |
| USEPA | Macroinvert JUGA             |
| USEPA | Macroinvert KATHROPERLA      |
| USEPA | Macroinvert KLOOSIA          |
| USEPA | Macroinvert KOENIKEA         |
| USEPA | Macroinvert KOGOTUS          |
| USEPA | Macroinvert KRENDOWSKIA      |
| USEPA | Macroinvert KRENDOWSKIIDAE   |
| USEPA | Macroinvert KRENOSMITTIA     |
| USEPA | Macroinvert LACCOBIUS        |
| USEPA | Macroinvert LACCOPHILUS      |
| USEPA | Macroinvert LAEVAPEX         |
| USEPA | Macroinvert LANX             |
| USEPA | Macroinvert LARA             |
| USEPA | Macroinvert LAUTERBORNIELLA  |
| USEPA | Macroinvert LEBERTIA         |
| USEPA | Macroinvert LEBERTIIDAE      |
| USEPA | Macroinvert LEPIDOPTERA      |
| USEPA | Macroinvert LEPIDOSTOMATIDAE |
| USEPA | Macroinvert LEPTOCERIDAE     |
| USEPA | Macroinvert LEPTOCERUS       |
| USEPA | Macroinvert LEPTOCHELIA      |
| USEPA | Macroinvert LEPTOCHELIIDAE   |
| USEPA | Macroinvert LEPTOHYPHES      |

|       |                             |
|-------|-----------------------------|
| USEPA | Macroinvert LEPTOHYPHIDAE   |
| USEPA | Macroinvert LEPTOPHLEBIIDAE |
| USEPA | Macroinvert LEPTOXIS        |
| USEPA | Macroinvert LESTES          |
| USEPA | Macroinvert LETHOCERUS      |
| USEPA | Macroinvert LEUCORRHINIA    |
| USEPA | Macroinvert LEUCTRIDAE      |
| USEPA | Macroinvert LIBELLULA       |
| USEPA | Macroinvert LIBELLULIDAE    |
| USEPA | Macroinvert LIGUMIA         |
| USEPA | Macroinvert LIMNEPHILIDAE   |
| USEPA | Macroinvert LIMNEPHILUS     |
| USEPA | Macroinvert LIMNESIA        |
| USEPA | Macroinvert LIMNESIIDAE     |
| USEPA | Macroinvert LIMNOCHARES     |
| USEPA | Macroinvert LIMNOCHARIDAE   |
| USEPA | Macroinvert LIMNOCORIS      |
| USEPA | Macroinvert LIMNODRILUS     |
| USEPA | Macroinvert LIMNOPHORA      |
| USEPA | Macroinvert LIODESSUS       |
| USEPA | Macroinvert LIOPLAX         |
| USEPA | Macroinvert LIPINELLA       |
| USEPA | Macroinvert LIPSOTHRIX      |
| USEPA | Macroinvert LIRCEUS         |
| USEPA | Macroinvert LITHASIA        |
| USEPA | Macroinvert LITOBIRANCHIA   |
| USEPA | Macroinvert LUMBRICIDAE     |
| USEPA | Macroinvert LUMBRICULIDAE   |
| USEPA | Macroinvert LUMBRICULUS     |
| USEPA | Macroinvert LUTROCHUS       |
| USEPA | Macroinvert LYMNAEA         |
| USEPA | Macroinvert LYMNAEIDAE      |
| USEPA | Macroinvert LYNCEUS         |
| USEPA | Macroinvert MACCAFFERTIUM   |

|       |                             |
|-------|-----------------------------|
| USEPA | Macroinvert MACRELMIS       |
| USEPA | Macroinvert MACROBRACHIUM   |
| USEPA | Macroinvert MACROSTEMUM     |
| USEPA | Macroinvert MALACOSTRACA    |
| USEPA | Macroinvert MALENKA         |
| USEPA | Macroinvert MARGARITIFERA   |
| USEPA | Macroinvert MARILIA         |
| USEPA | Macroinvert MARUINA         |
| USEPA | Macroinvert MATUS           |
| USEPA | Macroinvert MAYATRICHIA     |
| USEPA | Macroinvert MEGARCYS        |
| USEPA | Macroinvert MEGASCOLECIDAE  |
| USEPA | Macroinvert MELANOIDES      |
| USEPA | Macroinvert MENETUS         |
| USEPA | Macroinvert MERINGODIXA     |
| USEPA | Macroinvert MERYCOMYIA      |
| USEPA | Macroinvert MESOSMITTIA     |
| USEPA | Macroinvert METACNEPHIA     |
| USEPA | Macroinvert METRETOPODIDAE  |
| USEPA | Macroinvert METRICHIA       |
| USEPA | Macroinvert METRIOCNEMUS    |
| USEPA | Macroinvert MICROCHIRONOMUS |
| USEPA | Macroinvert MICROCYLLOEPUS  |
| USEPA | Macroinvert MIDEOPSIDAE     |
| USEPA | Macroinvert MIDEOPSIS       |
| USEPA | Macroinvert MOLANNA         |
| USEPA | Macroinvert MOLANNIDAE      |
| USEPA | Macroinvert MOLOPHILUS      |
| USEPA | Macroinvert MOMONIA         |
| USEPA | Macroinvert MONODIAMESA     |
| USEPA | Macroinvert MONOPELOPIA     |
| USEPA | Macroinvert MOOREOBDELLA    |
| USEPA | Macroinvert MOSELIA         |
| USEPA | Macroinvert MULINIA         |

|       |                            |
|-------|----------------------------|
| USEPA | Macroinvert MUSCIDAE       |
| USEPA | Macroinvert MUSCULIUM      |
| USEPA | Macroinvert MYSIDAE        |
| USEPA | Macroinvert MYSTACIDES     |
| USEPA | Macroinvert MYXOSARGUS     |
| USEPA | Macroinvert MYZOBDELLA     |
| USEPA | Macroinvert NAIDIDAE       |
| USEPA | Macroinvert NAIS           |
| USEPA | Macroinvert NARPUS         |
| USEPA | Macroinvert NASIAESCHNA    |
| USEPA | Macroinvert NAUCORIDAE     |
| USEPA | Macroinvert NAUTARACHNA    |
| USEPA | Macroinvert NEMATA         |
| USEPA | Macroinvert NEMERTEA       |
| USEPA | Macroinvert NEMOTAULIUS    |
| USEPA | Macroinvert NEMOTELUS      |
| USEPA | Macroinvert NEMOURIDAE     |
| USEPA | Macroinvert NEOACARIDAE    |
| USEPA | Macroinvert NEOCHOROTERPE  |
| USEPA | Macroinvert NEOELMIS       |
| USEPA | Macroinvert NEOEPHEMERA    |
| USEPA | Macroinvert NEOHERMES      |
| USEPA | Macroinvert NEOLIMNOCHARES |
| USEPA | Macroinvert NEOPLASTA      |
| USEPA | Macroinvert NEOPLEA        |
| USEPA | Macroinvert NEOSTEMPELLINA |
| USEPA | Macroinvert NEOTHREMMA     |
| USEPA | Macroinvert NEOTRICHIA     |
| USEPA | Macroinvert NEOZAVRELIA    |
| USEPA | Macroinvert NEPA           |
| USEPA | Macroinvert NEPHELOPSIS    |
| USEPA | Macroinvert NEREIDIDAE     |
| USEPA | Macroinvert NERITINA       |
| USEPA | Macroinvert NEUMANIA       |

|       |                            |
|-------|----------------------------|
| USEPA | Macroinvert NEUROCORDULIA  |
| USEPA | Macroinvert NILOTHAUMA     |
| USEPA | Macroinvert NOTERIDAE      |
| USEPA | Macroinvert NOTOPANISUS    |
| USEPA | Macroinvert NYMPHOMYIA     |
| USEPA | Macroinvert NYMPHOMYIIDAE  |
| USEPA | Macroinvert OBLIQUARIA     |
| USEPA | Macroinvert OCHTHEBIUS     |
| USEPA | Macroinvert OCTOGOMPHUS    |
| USEPA | Macroinvert ODONATA        |
| USEPA | Macroinvert ODONTOCERIDAE  |
| USEPA | Macroinvert ODONTOMYIA     |
| USEPA | Macroinvert OLIGOCHAETA    |
| USEPA | Macroinvert OLIGOPHLEBODES |
| USEPA | Macroinvert OLIGOSTOMIS    |
| USEPA | Macroinvert OLIVEIRIELLA   |
| USEPA | Macroinvert ONCONEURA      |
| USEPA | Macroinvert ONOCOSMOECUS   |
| USEPA | Macroinvert OPHIDONAIIS    |
| USEPA | Macroinvert OPHIOGOMPHUS   |
| USEPA | Macroinvert OPLONAECHNA    |
| USEPA | Macroinvert ORCONECTES     |
| USEPA | Macroinvert ORDOBREVIA     |
| USEPA | Macroinvert OREODYTES      |
| USEPA | Macroinvert OREOGETON      |
| USEPA | Macroinvert ORMOSIA        |
| USEPA | Macroinvert OROHERMES      |
| USEPA | Macroinvert OROPERLA       |
| USEPA | Macroinvert ORTHEMIS       |
| USEPA | Macroinvert ORTHOTRICHIA   |
| USEPA | Macroinvert OSTRACODA      |
| USEPA | Macroinvert OXIDAE         |
| USEPA | Macroinvert OXUS           |
| USEPA | Macroinvert PACHYDIPLAX    |

|       |                             |
|-------|-----------------------------|
| USEPA | Macroinvert PACIFASTACUS    |
| USEPA | Macroinvert PAGASTIELLA     |
| USEPA | Macroinvert PALAEAGAPETUS   |
| USEPA | Macroinvert PALAEMONETES    |
| USEPA | Macroinvert PALAEMONIDAE    |
| USEPA | Macroinvert PALTOTHEMIS     |
| USEPA | Macroinvert PANTALA         |
| USEPA | Macroinvert PARABOREOCHLUS  |
| USEPA | Macroinvert PARACLADIUS     |
| USEPA | Macroinvert PARACLOEODES    |
| USEPA | Macroinvert PARACRICOTOPUS  |
| USEPA | Macroinvert PARACYMUS       |
| USEPA | Macroinvert PARALIMNOPHYES  |
| USEPA | Macroinvert PARANAIS        |
| USEPA | Macroinvert PARAPERLA       |
| USEPA | Macroinvert PARAPLEA        |
| USEPA | Macroinvert PARAPONYX       |
| USEPA | Macroinvert PARASMITTIA     |
| USEPA | Macroinvert PAROCHLUS       |
| USEPA | Macroinvert PARORTHOCLADIUS |
| USEPA | Macroinvert PARTHINA        |
| USEPA | Macroinvert PARYDRA         |
| USEPA | Macroinvert PEDICIA         |
| USEPA | Macroinvert PEDOMOECUS      |
| USEPA | Macroinvert PELOCORIS       |
| USEPA | Macroinvert PELTODYTES      |
| USEPA | Macroinvert PELTOPERLA      |
| USEPA | Macroinvert PELTOPERLIDAE   |
| USEPA | Macroinvert PENTAGENIA      |
| USEPA | Macroinvert PERITHEMIS      |
| USEPA | Macroinvert PERLIDAE        |
| USEPA | Macroinvert PERLINODES      |
| USEPA | Macroinvert PERLODIDAE      |
| USEPA | Macroinvert PETROPHILA      |



|       |                               |
|-------|-------------------------------|
| USEPA | Macroinvert PHILOPOTAMIDAE    |
| USEPA | Macroinvert PHRYGANEIDAE      |
| USEPA | Macroinvert PHTHIRACARIDAE    |
| USEPA | Macroinvert PHYLLODOCIDAE     |
| USEPA | Macroinvert PHYLOCENTROPUS    |
| USEPA | Macroinvert PHYSA             |
| USEPA | Macroinvert PHYSELLA          |
| USEPA | Macroinvert PHYSIDAE          |
| USEPA | Macroinvert PIERSIGIIDAE      |
| USEPA | Macroinvert PIGUETIELLA       |
| USEPA | Macroinvert PILARIA           |
| USEPA | Macroinvert PIONA             |
| USEPA | Macroinvert PIONIDAE          |
| USEPA | Macroinvert PISCICOLA         |
| USEPA | Macroinvert PISCICOLIDAE      |
| USEPA | Macroinvert PISIDIIDAE        |
| USEPA | Macroinvert PISIDIUM          |
| USEPA | Macroinvert PLACOBDELLA       |
| USEPA | Macroinvert PLANORBELLA       |
| USEPA | Macroinvert PLANORBIDAE       |
| USEPA | Macroinvert PLANORBULA        |
| USEPA | Macroinvert PLATYCENTROPUS    |
| USEPA | Macroinvert PLATYSMITTIA      |
| USEPA | Macroinvert PLAUDITUS         |
| USEPA | Macroinvert PLECOPTERA        |
| USEPA | Macroinvert PLEIDAE           |
| USEPA | Macroinvert PLEUROCERA        |
| USEPA | Macroinvert PLEUROCERIDAE     |
| USEPA | Macroinvert PLUMIPERLA        |
| USEPA | Macroinvert PODMOSTA          |
| USEPA | Macroinvert POLYCELIS         |
| USEPA | Macroinvert POLYCENTROPODIDAE |
| USEPA | Macroinvert POLYCHAETA        |
| USEPA | Macroinvert POLYMITARCYIDAE   |

|       |                                   |
|-------|-----------------------------------|
| USEPA | Macroinvert POLYPLECTROPUS        |
| USEPA | Macroinvert POMATIOPSIS           |
| USEPA | Macroinvert PORIFERA              |
| USEPA | Macroinvert PORTUNIDAE            |
| USEPA | Macroinvert POSTELICHUS           |
| USEPA | Macroinvert POTAMOTHRIX           |
| USEPA | Macroinvert POTAMYIA              |
| USEPA | Macroinvert PRISTINA              |
| USEPA | Macroinvert PRISTINELLA           |
| USEPA | Macroinvert PROCAMBARUS           |
| USEPA | Macroinvert PRODIAMESA            |
| USEPA | Macroinvert PROMENETUS            |
| USEPA | Macroinvert PROSTOMA              |
| USEPA | Macroinvert PROTANYDERUS          |
| USEPA | Macroinvert PROTANYPUS            |
| USEPA | Macroinvert PROTOPLASA            |
| USEPA | Macroinvert PROTOPTILA            |
| USEPA | Macroinvert PROTZIA               |
| USEPA | Macroinvert PROTZIIDAE            |
| USEPA | Macroinvert PSECTROTANYPUS        |
| USEPA | Macroinvert PSEPHENIDAE           |
| USEPA | Macroinvert PSEUDIRON             |
| USEPA | Macroinvert PSEUDOCENTROPTILOIDES |
| USEPA | Macroinvert PSEUDOCHIRONOMUS      |
| USEPA | Macroinvert PSEUDOCLOEON          |
| USEPA | Macroinvert PSEUDODIAMESA         |
| USEPA | Macroinvert PSEUDOLIMNOPHILA      |
| USEPA | Macroinvert PSEUDOSMITTIA         |
| USEPA | Macroinvert PSEUDOSUCCINEA        |
| USEPA | Macroinvert PSOROPHORA            |
| USEPA | Macroinvert PSYCHODA              |
| USEPA | Macroinvert PSYCHODIDAE           |
| USEPA | Macroinvert PSYCHOGLYPHA          |
| USEPA | Macroinvert PSYCHOMYIIDAE         |

|       |                             |
|-------|-----------------------------|
| USEPA | Macroinvert PTERONARCELLA   |
| USEPA | Macroinvert PTERONARCYIDAE  |
| USEPA | Macroinvert PTILOSTOMIS     |
| USEPA | Macroinvert PTYCHOPTERA     |
| USEPA | Macroinvert PTYCHOPTERIDAE  |
| USEPA | Macroinvert PYRALIDAE       |
| USEPA | Macroinvert QUISTRADRILUS   |
| USEPA | Macroinvert RADOTANYPUS     |
| USEPA | Macroinvert RAMELLOGAMMARUS |
| USEPA | Macroinvert RANATRA         |
| USEPA | Macroinvert REMENUS         |
| USEPA | Macroinvert REOMYIA         |
| USEPA | Macroinvert RHABDOMASTIX    |
| USEPA | Macroinvert RHITHROGENA     |
| USEPA | Macroinvert RHITHROPANOPEUS |
| USEPA | Macroinvert RHIZELMIS       |
| USEPA | Macroinvert RHYACODRILUS    |
| USEPA | Macroinvert RHYACOPHILIDAE  |
| USEPA | Macroinvert RICKERA         |
| USEPA | Macroinvert RIPISTES        |
| USEPA | Macroinvert ROBACKIA        |
| USEPA | Macroinvert ROEDERIODES     |
| USEPA | Macroinvert SABELLIDAE      |
| USEPA | Macroinvert SANFILIPPODYTES |
| USEPA | Macroinvert SARCOPTIFORMES  |
| USEPA | Macroinvert SCATELLA        |
| USEPA | Macroinvert SCATOPHILA      |
| USEPA | Macroinvert SCIARIDAE       |
| USEPA | Macroinvert SCIOMYZIDAE     |
| USEPA | Macroinvert SCIRTES         |
| USEPA | Macroinvert SCIRTIDAE       |
| USEPA | Macroinvert SEPEDON         |
| USEPA | Macroinvert SERGENTIA       |
| USEPA | Macroinvert SERICOSTRIATA   |

|       |                            |
|-------|----------------------------|
| USEPA | Macroinvert SETACERA       |
| USEPA | Macroinvert SETODES        |
| USEPA | Macroinvert SETVENA        |
| USEPA | Macroinvert SIERRAPERLA    |
| USEPA | Macroinvert SILVIUS        |
| USEPA | Macroinvert SIPHLONURIDAE  |
| USEPA | Macroinvert SIPHLOPLECTON  |
| USEPA | Macroinvert SISYRA         |
| USEPA | Macroinvert SISYRIDAE      |
| USEPA | Macroinvert SKWALA         |
| USEPA | Macroinvert SLAVINA        |
| USEPA | Macroinvert SMICRIDEA      |
| USEPA | Macroinvert SMITTIA        |
| USEPA | Macroinvert SOLIPERLA      |
| USEPA | Macroinvert SPARBARUS      |
| USEPA | Macroinvert SPECARIA       |
| USEPA | Macroinvert SPERCHON       |
| USEPA | Macroinvert SPERCHONIDAE   |
| USEPA | Macroinvert SPERCHONOPSIS  |
| USEPA | Macroinvert SPERCHOPSIS    |
| USEPA | Macroinvert SPHAERIUM      |
| USEPA | Macroinvert SPIONIDAE      |
| USEPA | Macroinvert SPIROSPERMA    |
| USEPA | Macroinvert STACTOBIELLA   |
| USEPA | Macroinvert STAGNICOLA     |
| USEPA | Macroinvert STAPHYLINIDAE  |
| USEPA | Macroinvert STELECHOMYIA   |
| USEPA | Macroinvert STEMPELLINA    |
| USEPA | Macroinvert STENOCOLUS     |
| USEPA | Macroinvert STEPHENSONIANA |
| USEPA | Macroinvert STICTOTARSUS   |
| USEPA | Macroinvert STILOCLADIUS   |
| USEPA | Macroinvert STRATIOMYIDAE  |
| USEPA | Macroinvert STRATIOMYS     |

|       |                                       |
|-------|---------------------------------------|
| USEPA | Macroinvert STYGOBROMUS               |
| USEPA | Macroinvert STYGOTHROMBIDIIDAE        |
| USEPA | Macroinvert STYGOTHROMBIUM            |
| USEPA | Macroinvert STYLARIA                  |
| USEPA | Macroinvert STYLODRILUS               |
| USEPA | Macroinvert STYLURUS                  |
| USEPA | Macroinvert SUPHIS                    |
| USEPA | Macroinvert SUPHISELLUS               |
| USEPA | Macroinvert SURAGINA                  |
| USEPA | Macroinvert SUWALLIA                  |
| USEPA | Macroinvert SYMBIOCLADIUS             |
| USEPA | Macroinvert SYMPETRUM                 |
| USEPA | Macroinvert SYNORTHOCLADIUS           |
| USEPA | Macroinvert SYNURELLA                 |
| USEPA | Macroinvert SYRPHIDAE                 |
| USEPA | Macroinvert TABANIDAE                 |
| USEPA | Macroinvert TABANUS                   |
| USEPA | Macroinvert TAENIONEMA                |
| USEPA | Macroinvert TAENIOPTERYGIDAE          |
| USEPA | Macroinvert TALLAPERLA                |
| USEPA | Macroinvert TAPHROMYSIS               |
| USEPA | Macroinvert TELOGANOPSIS              |
| USEPA | Macroinvert TEMPISQUITONEURA          |
| USEPA | Macroinvert TENERIDRILUS              |
| USEPA | Macroinvert TESTUDACARUS              |
| USEPA | Macroinvert TETANOCERA                |
| USEPA | Macroinvert TEUTONIA                  |
| USEPA | Macroinvert THAUMALEIDAE              |
| USEPA | Macroinvert THEROMYZON                |
| USEPA | Macroinvert THIENEMANNIA              |
| USEPA | Macroinvert THIENEMANNIMYIA_GENUS_GR. |
| USEPA | Macroinvert THOLYMIS                  |
| USEPA | Macroinvert THRAULODES                |
| USEPA | Macroinvert THYOPSIS                  |

|       |                              |
|-------|------------------------------|
| USEPA | Macroinvert TINODES          |
| USEPA | Macroinvert TIPULIDAE        |
| USEPA | Macroinvert TOKUNAGAIA       |
| USEPA | Macroinvert TORRENTICOLA     |
| USEPA | Macroinvert TORRENTICOLIDAE  |
| USEPA | Macroinvert TORTOPUS         |
| USEPA | Macroinvert TOXOLASMA        |
| USEPA | Macroinvert TRAVERELLA       |
| USEPA | Macroinvert TRIAENODES       |
| USEPA | Macroinvert TRICHOCLINOCERA  |
| USEPA | Macroinvert TRICHOPTERA      |
| USEPA | Macroinvert TRICORYHYPHES    |
| USEPA | Macroinvert TRICORYTHODES    |
| USEPA | Macroinvert TRIOGMA          |
| USEPA | Macroinvert TRIZNAKA         |
| USEPA | Macroinvert TROMBIDIFORMES   |
| USEPA | Macroinvert TROPISTERNUS     |
| USEPA | Macroinvert TUBIFEX          |
| USEPA | Macroinvert TUBIFICIDAE      |
| USEPA | Macroinvert TUBIFICOIDES     |
| USEPA | Macroinvert TURBELLARIA      |
| USEPA | Macroinvert TWINNIA          |
| USEPA | Macroinvert TYRRELLIA        |
| USEPA | Macroinvert UCA              |
| USEPA | Macroinvert UENOIDAE         |
| USEPA | Macroinvert UNCINAI          |
| USEPA | Macroinvert UNIONICOLA       |
| USEPA | Macroinvert UNIONICOLIDAE    |
| USEPA | Macroinvert UNIONIDAE        |
| USEPA | Macroinvert UNIONOIDA        |
| USEPA | Macroinvert UTTERBACKIA      |
| USEPA | Macroinvert VACUPERNIUS      |
| USEPA | Macroinvert VALVATA          |
| USEPA | Macroinvert VARICHAETADRILUS |

|       |                                  |
|-------|----------------------------------|
| USEPA | Macroinvert VEJDOVSKYELLA        |
| USEPA | Macroinvert VENEROIDA            |
| USEPA | Macroinvert VISOKA               |
| USEPA | Macroinvert VIVIPARIDAE          |
| USEPA | Macroinvert VIVIPARUS            |
| USEPA | Macroinvert VORTICIFEX           |
| USEPA | Macroinvert WANDESIA             |
| USEPA | Macroinvert WETTINA              |
| USEPA | Macroinvert WIEDEMANNIA          |
| USEPA | Macroinvert XENOCHIRONOMUS       |
| USEPA | Macroinvert XESTOCHIRONOMUS      |
| USEPA | Macroinvert YLODES               |
| USEPA | Macroinvert YORAPERLA            |
| USEPA | Macroinvert YPHRIA               |
| USEPA | Macroinvert YUGUS                |
| USEPA | Macroinvert ZAITZEVIA            |
| USEPA | Macroinvert ZALUTSCHIA           |
| USEPA | Macroinvert ZAPADA               |
| USEPA | Macroinvert ZAVRELIELLA          |
| MBSS  | Macroinvert HOMOPLECTRA          |
| MBSS  | Macroinvert ODONTOMESA           |
| MBSS  | Macroinvert PERLESTA             |
| MBSS  | Macroinvert ZAVRELIA             |
| NCBMP | Macroinvert LABRUNDINIA_SPP      |
| NCBMP | Macroinvert HYDROBIUS_TUMIDUS    |
| NCBMP | Macroinvert ANAX_LONGIPES        |
| NCBMP | Macroinvert GOELDICHIRONOMUS_SPP |
| NCBMP | Macroinvert PLANORBELLA_SPP      |
| NCBMP | Macroinvert ALLUAUDOMYIA_SPP     |
| NCBMP | Macroinvert MICROCHIRONOMUS_SPP  |
| NCBMP | Macroinvert NOTOMICRUS_NANULUS   |
| NCBMP | Macroinvert NEOPORUS_MELLITUS    |
| NCBMP | Macroinvert MONOHELEA_SPP        |
| NCBMP | Macroinvert NANOCLADIUS_SP_D     |

|       |                                            |
|-------|--------------------------------------------|
| NCBMP | Macroinvert ABLABESMYIA_SIMPSONI           |
| NCBMP | Macroinvert HIRUDINEA                      |
| NCBMP | Macroinvert HALIPLUS_FASCIATUS             |
| NCBMP | Macroinvert NAIS_VARIABILIS                |
| NCBMP | Macroinvert ASHEUM_BECKAE                  |
| NCBMP | Macroinvert DEMICRYPTOCHIRONOMUS_CUNEATUS  |
| NCBMP | Macroinvert HEMERODROMIA_SPP               |
| NCBMP | Macroinvert FRENESIA_SPP                   |
| NCBMP | Macroinvert LACCOPHILUS_SPP                |
| NCBMP | Macroinvert ALLONAIIS_SPP                  |
| NCBMP | Macroinvert CRICOTOPUS_ABSURDUS            |
| NCBMP | Macroinvert OPISTHOPORA                    |
| NCBMP | Macroinvert POTTHASTIA_SPP                 |
| NCBMP | Macroinvert MOLANNA_ULMERINA               |
| NCBMP | Macroinvert PLATYSMITTIA_FIMBRIATA         |
| NCBMP | Macroinvert AMNICOLA_SPP                   |
| NCBMP | Macroinvert MICROPSECTRA_SP_B              |
| NCBMP | Macroinvert STENELMIS_CRENATA              |
| NCBMP | Macroinvert ENDOCHIRONOMUS_SPP             |
| NCBMP | Macroinvert CERCOBRACHYS_SPP               |
| NCBMP | Macroinvert MYZOBDELLA_LUGUBRIS            |
| NCBMP | Macroinvert CRICOTOPUS_TRIFASCIA           |
| NCBMP | Macroinvert MICROPSECTRA_SP_C              |
| NCBMP | Macroinvert LACCOBIUS_AGILIS               |
| NCBMP | Macroinvert EINFELDIA_SPP                  |
| NCBMP | Macroinvert HYDROCHARA_SPP                 |
| NCBMP | Macroinvert LETHOCERUS_SPP                 |
| NCBMP | Macroinvert PSILOMETRIOCNEMUS_TRIANNULATUS |
| NCBMP | Macroinvert TANYTARSUS_SP_3                |
| NCBMP | Macroinvert PARAKIEFFERIELLA_SP_F          |
| NCBMP | Macroinvert CAMBARUS_C_BARTONII_BARTONII   |
| NCBMP | Macroinvert SAETHERIA_SP_1                 |
| NCBMP | Macroinvert MOOREOBDELLA_SPP               |
| NCBMP | Macroinvert PLANORBELLA_DURYI              |



|       |                                           |
|-------|-------------------------------------------|
| NCBMP | Macroinvert PLATAMBUS_SPP                 |
| NCBMP | Macroinvert PROMENETUS_EXACUOUS           |
| NCBMP | Macroinvert OSTRACERCA_SPP                |
| NCBMP | Macroinvert STEMPELLINELLA_LEPTOCELLOIDES |
| NCBMP | Macroinvert ZAVRELIMYIA_SP_A              |
| NCBMP | Macroinvert POLYPEDILUM_SP_FL             |
| NCBMP | Macroinvert CELITHEMIS_SPP                |
| NCBMP | Macroinvert DICROTENDIPES_THANATOGRATUS   |
| NCBMP | Macroinvert VEJDOVSKYELLA_COMATA          |
| NCBMP | Macroinvert NILOTANYPUS_SPP               |
| NCBMP | Macroinvert SMITTIA_SPP                   |
| NCBMP | Macroinvert DOLICHOPEZA_SPP               |
| NCBMP | Macroinvert DOLICHOPODIDAE                |
| NCBMP | Macroinvert TANYTARSUS_GUERLUS            |
| NCBMP | Macroinvert ISOCHAETIDES_FREYI            |
| NCBMP | Macroinvert HAEMONAIS_WALDVOGELI          |
| NCBMP | Macroinvert LIPSOTHRIX_SPP                |
| NCBMP | Macroinvert HYDROBIUS_MELAEUS             |
| NCBMP | Macroinvert GYMNOMETRIOCNEMUS_SPP         |
| NCBMP | Macroinvert SPIROSPERMA_FEROX             |
| NCBMP | Macroinvert NEHALENNIA_SPP                |
| NCBMP | Macroinvert BETHBILBECKIA_SPP             |
| NCBMP | Macroinvert KRENOSMITTIA_SPP              |
| NCBMP | Macroinvert MOLANNA_UNIOPHILA             |
| NCBMP | Macroinvert CLADOTANYTARSUS_SP_C          |
| NCBMP | Macroinvert LASMIGONA_SPP                 |
| NCBMP | Macroinvert AXARUS_SPP                    |
| NCBMP | Macroinvert ASIOPLAX_DOLANI               |
| NCBMP | Macroinvert ORIMARGA_SPP                  |
| NCBMP | Macroinvert COPTOTOMUS_LOTICUS            |
| NCBMP | Macroinvert ENOCHRUS_SAYI                 |
| NCBMP | Macroinvert CYATHURA_POLITA               |
| NCBMP | Macroinvert HETEROSTERNUTA_PULCHER        |
| NCBMP | Macroinvert EPHEMEROPTERA                 |

|       |                                         |
|-------|-----------------------------------------|
| NCBMP | Macroinvert AMPHIPODA                   |
| NCBMP | Macroinvert LACCOPHILUS_FASCIATUS_RUFUS |
| NCBMP | Macroinvert CLADOTANYTARSUS_SP_E        |
| NCBMP | Macroinvert HUDSONIMYIA_KARELENA        |
| NCBMP | Macroinvert UVARUS_SPP                  |
| NCBMP | Macroinvert CHAULIODES_SPP              |
| NCBMP | Macroinvert TOKUNAGAIA_SPP              |
| NCBMP | Macroinvert STEPHENSONIANA_SPP          |
| NCBMP | Macroinvert BAGOUS_SPP                  |
| NCBMP | Macroinvert PHAENONOTUM_EXSTRIATUM      |
| NCBMP | Macroinvert ZAVRELIELLA_MARMORATA       |
| NCBMP | Macroinvert SCIOMYZIDAE                 |
| NCBMP | Macroinvert PARAPOYNX_SPP               |
| NCBMP | Macroinvert MOOREOBDELLA_TETRAGON       |
| NCBMP | Macroinvert CELINA_SPP                  |
| NCBMP | Macroinvert TANYTARSINI                 |
| NCBMP | Macroinvert CYPHON_SPP                  |
| NCBMP | Macroinvert CLADOTANYTARSUS_SP_H        |
| NCBMP | Macroinvert DYTHEMIS_VELOX              |
| NCBMP | Macroinvert SAETHERIA_HIRTA             |
| NCBMP | Macroinvert EPOICOCCLADIUS_FLAVENS      |
| NCBMP | Macroinvert HELOCHARES_MACULICOLLIS     |
| NCBMP | Macroinvert TELMATOSCOPUS_SPP           |
| NCBMP | Macroinvert RHEOPELOPIA_SP_3            |
| NCBMP | Macroinvert RASVENA_TERNA               |
| NCBMP | Macroinvert ORTHOCLADIUS_RIVULORUM      |
| NCBMP | Macroinvert CERCOBRACHYS_ETOWAH         |
| NCBMP | Macroinvert NANOCLADIUS_SPINIPLenus     |
| NCBMP | Macroinvert MACROPELOPIA_SPP            |
| NCBMP | Macroinvert MUSCIDAE                    |
| NCBMP | Macroinvert PARAKIEFFERIELLA_SPP        |
| NCBMP | Macroinvert TANYPUS_CARINATUS           |
| NCBMP | Macroinvert LIOPLAX_SUBCARINATA         |
| NCBMP | Macroinvert COPTOTOMUS_SPP              |

|       |                                           |
|-------|-------------------------------------------|
| NCBMP | Macroinvert ENOCHRUS_PYGMAEUS             |
| NCBMP | Macroinvert PSECTROCLADIUS_ELATUS         |
| NCBMP | Macroinvert CHAULIODES_PECTINICORNIS      |
| NCBMP | Macroinvert ALOTANYPUS_SPP                |
| NCBMP | Macroinvert SYMPOTTHASTIA_SPP             |
| NCBMP | Macroinvert NANOCLADIUS_DISTINCTUS        |
| NCBMP | Macroinvert LEPIDOPTERA                   |
| NCBMP | Macroinvert PLATHEMIS_LYDIA               |
| NCBMP | Macroinvert METRIOCNEMUS_SPP              |
| NCBMP | Macroinvert VIEHOPERLA_ADA                |
| NCBMP | Macroinvert GOMPHAESCHNA_ANTILOPE         |
| NCBMP | Macroinvert PLAUDITUS_GLOVERI             |
| NCBMP | Macroinvert HELIUS_SPP                    |
| NCBMP | Macroinvert ACILIUS_SPP                   |
| NCBMP | Macroinvert LIMNOPHORA_SPP                |
| NCBMP | Macroinvert TROPISTERNUS_LATERALIS        |
| NCBMP | Macroinvert LIODESSUS_SPP                 |
| NCBMP | Macroinvert TRICHOPTERA                   |
| NCBMP | Macroinvert CRICOTOPUS_ORTHOCLADIUS_SPP   |
| NCBMP | Macroinvert ULOMORPHA_SPP                 |
| NCBMP | Macroinvert SEPEDON_SPP                   |
| NCBMP | Macroinvert MACROBDELLA_DITETRA           |
| NCBMP | Macroinvert CULICOIDES_SPP                |
| NCBMP | Macroinvert GOELDICHIRONOMUS_HOLOPRASINUS |
| NCBMP | Macroinvert PARACLADOPELMA_UNDINE         |
| NCBMP | Macroinvert LIOPOREUS_SPP                 |
| NCBMP | Macroinvert DYTISCUS_SPP                  |
| NCBMP | Macroinvert ANAX_SPP                      |
| NCBMP | Macroinvert PLACOBDELLA_ORNATA            |
| NCBMP | Macroinvert CARDIOCLADIUS_ALBIPLUMUS      |
| NCBMP | Macroinvert DESMOPACHRIA_SPP              |
| NCBMP | Macroinvert AGARODES_SPP                  |
| NCBMP | Macroinvert ILYBIUS_SPP                   |
| NCBMP | Macroinvert EPHYDRIDAE                    |

|       |                                             |
|-------|---------------------------------------------|
| NCBMP | Macroinvert LACCOBIUS_REFLEXIPENIS          |
| NCBMP | Macroinvert ABLABESMYIA_HAUBERI             |
| NCBMP | Macroinvert HYDROBIUS_SPP                   |
| NCBMP | Macroinvert PLACOBDELLA_MULTILINEATA        |
| NCBMP | Macroinvert RHEOCRICOTOPUS_UNIDENTATUS      |
| NCBMP | Macroinvert PARACYMUS_SPP                   |
| NCBMP | Macroinvert PARAKIEFFERIELLA_SP_A           |
| NCBMP | Macroinvert REOMYIA_SPP                     |
| NCBMP | Macroinvert MOLOPHILUS_SPP                  |
| NCBMP | Macroinvert PLAUDITUS_SPP                   |
| NCBMP | Macroinvert STEMPELLINA_SPP                 |
| NCBMP | Macroinvert DEMICRYPTOCHIRONOMUS_SP_A       |
| NCBMP | Macroinvert HYDROPHILIDAE                   |
| NCBMP | Macroinvert PARAKIEFFERIELLA_SP_B           |
| NCBMP | Macroinvert CARDIOCLADIUS_SPP               |
| NCBMP | Macroinvert MYSTACIDES_SPP                  |
| NCBMP | Macroinvert BARBAETIS_BENFIELDI             |
| NCBMP | Macroinvert TABANIDAE                       |
| NCBMP | Macroinvert CAECIDOTEA_SP_4_NR_LATICAUDATUS |
| NCBMP | Macroinvert SPHAERIUM_SIMILE                |
| NCBMP | Macroinvert HYGROTUS_SPP                    |
| NCBMP | Macroinvert ORTHOCLADIUS_SAXOSUS            |
| NCBMP | Macroinvert TROPISTERNUS_COLLARIS           |
| NCBMP | Macroinvert TANYPUS_PUNCTIPENNIS            |
| NCBMP | Macroinvert DIXIDAE                         |
| NCBMP | Macroinvert LACCOBIUS_MINUTOIDES            |
| NCBMP | Macroinvert CULICIDAE                       |
| NCBMP | Macroinvert TSALIA_BERNERI                  |
| NCBMP | Macroinvert HARNISCHIA_SPP                  |
| NCBMP | Macroinvert LIMNODRILUS_UDEKEMIANUS         |
| NCBMP | Macroinvert MACROMIIDAE                     |
| NCBMP | Macroinvert LIPINIELLA_SPP                  |
| NCBMP | Macroinvert PROTOPLASA_FITCHII              |
| NCBMP | Macroinvert PLACOBDELLA_SPP                 |

|       |                                          |
|-------|------------------------------------------|
| NCBMP | Macroinvert HELISOMA_TRIVOLVIS           |
| NCBMP | Macroinvert PARACHIRONOMUS_SPP           |
|       | PARACHIRONOMUS_TENUICAUDATUS_CO          |
| NCBMP | Macroinvert MPLEX                        |
| NCBMP | Macroinvert CRICOTOPUS_LUCIAE_TREMULUS   |
|       | DEMICRYPTOCHIRONOMUS_SP_B_CUNEAT         |
| NCBMP | Macroinvert US                           |
| NCBMP | Macroinvert TANYTARSUS_SP_V              |
| NCBMP | Macroinvert PLANORBELLA_TRIVOLVIS        |
| NCBMP | Macroinvert PARACHIRONOMUS_CARINATUS     |
| NCBMP | Macroinvert PSECTROTANYPUS_DYARI         |
| NCBMP | Macroinvert SPECARIA_JOSINAE             |
| NCBMP | Macroinvert RHEOPELOPIA_SPP              |
| NCBMP | Macroinvert QUISTADRILUS_MULTISETOSUS    |
| NCBMP | Macroinvert ALBOGLOSSIPHONIA_HETEROCLITA |
| NCBMP | Macroinvert DERO_SPP                     |
| NCBMP | Macroinvert HYDROCOLUS_SPP               |
| NCBMP | Macroinvert PEDICIA_SPP                  |
| NCBMP | Macroinvert TANYTARSUS_SP_O              |
| NCBMP | Macroinvert PRODATICUS_BIMARGINATUS      |
| NCBMP | Macroinvert SPIROSPERMA_CAROLINENSIS     |
| NCBMP | Macroinvert ORMOSIA_SPP                  |
| NCBMP | Macroinvert PHRYGANEIDAE                 |
| NCBMP | Macroinvert MACCAFFERTIUM_VICARIUM       |
| NCBMP | Macroinvert SPIROSPERMA_SPP              |
| NCBMP | Macroinvert DANNELLA_SIMPLEX             |
| NCBMP | Macroinvert PAGASTIELLA_SPP              |
| NCBMP | Macroinvert AULODRILUS_PLURISETA         |
| NCBMP | Macroinvert ERYTHEMIS_SPP                |
| NCBMP | Macroinvert PARACHIRONOMUS_FREQUENS      |
| NCBMP | Macroinvert NEOZAVRELIA_SPP              |
| NCBMP | Macroinvert ENOCHRUS_SPP                 |
| NCBMP | Macroinvert PSYCHODA_SPP                 |
| NCBMP | Macroinvert CULEX_SPP                    |

|       |                                       |
|-------|---------------------------------------|
| NCBMP | Macroinvert RHEOSMITTIA_SPP           |
| NCBMP | Macroinvert LABIOBAETIS_SPP           |
| NCBMP | Macroinvert FRIDERICIA_SPP            |
| NCBMP | Macroinvert LACCOBIUS_SPP             |
| NCBMP | Macroinvert PLACOBDELLA_NUCHALIS      |
| NCBMP | Macroinvert STILOCLADIUS_CLINOPECTEN  |
| NCBMP | Macroinvert BRILLIA_PARVA             |
| NCBMP | Macroinvert PARAMERINA_SPP            |
| NCBMP | Macroinvert PSECTROCLADIUS_SPP        |
| NCBMP | Macroinvert HELOCOMBUS_SPP            |
| NCBMP | Macroinvert PARACRICOTOPUS_SPP        |
| NCBMP | Macroinvert NEMERTEA                  |
| NCBMP | Macroinvert NEOPORUS_AULICUS          |
| NCBMP | Macroinvert NILOTANYPUS_AMERICANUS    |
| NCBMP | Macroinvert RANATRA_AUSTRALIS         |
| NCBMP | Macroinvert KRIBIODORUM_PERPULCHRUM   |
| NCBMP | Macroinvert PSEUDOCENTROPTILOIDES_USA |
| NCBMP | Macroinvert GLOIOBDELLA_ELONGATA      |
| NCBMP | Macroinvert HYDROMETRA_SPP            |
| NCBMP | Macroinvert CERATOPOGON_SPP           |
| NCBMP | Macroinvert CERNOTINA_SPP             |
| NCBMP | Macroinvert DEMICRYPTOCHIRONOMUS_SP_B |
| NCBMP | Macroinvert EPOICOCCLADIUS_SP_3       |
| NCBMP | Macroinvert NEOEPHEMERA_YOUNGI        |
| NCBMP | Macroinvert DASYHELEA_SPP             |
| NCBMP | Macroinvert PARAPHAENOCLADIUS_SPP     |
| NCBMP | Macroinvert ORTHOCLADIUS_RIVICOLA     |
| NCBMP | Macroinvert CRICOTOPUS_INFUSCATUS     |
| NCBMP | Macroinvert ROBACKIA_CLAVIGER         |
| NCBMP | Macroinvert TROPISTERNUS_NATATOR      |
| NCBMP | Macroinvert ENOCHRUS_OCHRACEUS        |
| NCBMP | Macroinvert HYDROCHUS_SPP             |
| NCBMP | Macroinvert ERYTHEMIS_SIMPLICICOLLIS  |
| NCBMP | Macroinvert TANYTARSUS_SP_P           |

|       |                                             |
|-------|---------------------------------------------|
| NCBMP | Macroinvert ATRICHOPOGON_SPP                |
| NCBMP | Macroinvert CRICOTOPUS_CF_CYLINDRACEUS      |
| NCBMP | Macroinvert SUPHISELLUS_SPP                 |
| NCBMP | Macroinvert NOTONECTA_SPP                   |
| NCBMP | Macroinvert STEMPELLINELLA_SPP              |
| NCBMP | Macroinvert TANYTARSUS_SP_D                 |
| NCBMP | Macroinvert NAIS_BEHNINGI                   |
| NCBMP | Macroinvert LIOPOREUS_PILATEI               |
| NCBMP | Macroinvert DJALMABATISTA_PULCHRA           |
| NCBMP | Macroinvert DICROTENDIPES_FUMIDUS           |
| NCBMP | Macroinvert CLADOTANYTARSUS_SP_A            |
| NCBMP | Macroinvert TRIAENODES_MELACUS              |
| NCBMP | Macroinvert HETEROTRISSOCLADIUS_MARCIDUS    |
| NCBMP | Macroinvert MOLANNA_SPP                     |
| NCBMP | Macroinvert LIOPOREUS_TRIANGULARIS          |
| NCBMP | Macroinvert DEMICRYPTOCHIRONOMUS_SP_C       |
|       |                                             |
| NCBMP | Macroinvert LACCOPHILUS_MACULOSUS_MACULOSUS |
| NCBMP | Macroinvert SPHAEROMIAS_SPP                 |
| NCBMP | Macroinvert EIPHRAGMA_SPP                   |
| NCBMP | Macroinvert OULIMNIUS_SPP                   |
| NCBMP | Macroinvert PARATENDIPES_SUBAEQUALIS        |
| NCBMP | Macroinvert NEOPLEA_SPP                     |
| NCBMP | Macroinvert APSECTROTANYPUS_JOHNSONI        |
| NCBMP | Macroinvert STEMPELLINELLA_FIMBRIATA        |
| NCBMP | Macroinvert ISWAEON_DAVIDI                  |
| NCBMP | Macroinvert TROPISTERNUS_BLATCHLEYI         |
| NCBMP | Macroinvert THIENEMANNIELLA_SP_B            |
| NCBMP | Macroinvert CHLOROTABANUS_CREPUSCULARIS     |
| NCBMP | Macroinvert FOSSARIA_SPP                    |
| NCBMP | Macroinvert ABLABESMYIA_SPP                 |
| NCBMP | Macroinvert TANYTARSUS_SP_T                 |
| NCBMP | Macroinvert TRISSOPELOPIA_OGEMAWI           |
| NCBMP | Macroinvert EUKIEFFERIELLA_TIROLENSIS       |

|       |                                        |
|-------|----------------------------------------|
| NCBMP | Macroinvert BRUNDINIELLA_EUMORPHA      |
| NCBMP | Macroinvert PRISTINA_SPP               |
| NCBMP | Macroinvert ORTHOCLADIUS_VAILLANTI     |
| NCBMP | Macroinvert ERPOBDELLA_PUNCTATA        |
| NCBMP | Macroinvert GUTTIPELOPIA_GUTTIPENNIS   |
| NCBMP | Macroinvert CONGERIA_LEUCOPHAETA       |
| NCBMP | Macroinvert SPARBARUS_MACULATUS        |
| NCBMP | Macroinvert ISOCHAETIDES_CURVISETOSUS  |
| NCBMP | Macroinvert ORTHOCLADIUS_RUBICUNDUS    |
| NCBMP | Macroinvert LIMONIA_SPP                |
| NCBMP | Macroinvert PRISTINELLA_SPP            |
| NCBMP | Macroinvert TRIAENODES_MARGINATUS      |
| NCBMP | Macroinvert PALMACORIXA_SPP            |
| NCBMP | Macroinvert NANOCLADIUS_ALTERNANTHERAE |
| NCBMP | Macroinvert TROPISTERNUS_SPP           |
| NCBMP | Macroinvert ORCONNECTES_SPP            |
| NCBMP | Macroinvert GONIELMIS_DIETRICH         |
| NCBMP | Macroinvert HELOPHORUS_SPP             |
| NCBMP | Macroinvert BIDESSIONOTUS_SPP          |
| NCBMP | Macroinvert CORYNONEURA_FLORIDAENSIS   |
| NCBMP | Macroinvert RANATRA_NIGRA              |
| NCBMP | Macroinvert DESSEROBDELLA_PHALERA      |
| NCBMP | Macroinvert HYDROVATUS_PUSTULATUS      |
| NCBMP | Macroinvert OPTIOSERVUS_IMMUNIS        |
| NCBMP | Macroinvert CHAETOCLADIUS_SPP          |
| NCBMP | Macroinvert PARAKIEFFERIELLA_SP_D      |
| NCBMP | Macroinvert MOOREOBDELLA_MICROSTOMA    |
| NCBMP | Macroinvert SPHAERIIDAE                |
| NCBMP | Macroinvert CLADOTANYTARSUS_SPP        |
| NCBMP | Macroinvert CHIRONOMINI                |
| NCBMP | Macroinvert TUBIFEX_TUBIFEX            |
| NCBMP | Macroinvert CLADOPELMA_SPP             |
| NCBMP | Macroinvert XESTOCHIRONOMUS_SPP        |
| NCBMP | Macroinvert RANGIA_CUNEATA             |



|       |                                           |
|-------|-------------------------------------------|
| NCBMP | Macroinvert COPELATUS_SPP                 |
| NCBMP | Macroinvert NEOEPHEMERA_SPP               |
| NCBMP | Macroinvert PLANORBULA_ARMIGERA           |
| NCBMP | Macroinvert PSEUDORTHOCLADIUS_SPP         |
| NCBMP | Macroinvert RHEOCRICOTOPUS_EMINELLOBUS    |
| NCBMP | Macroinvert DUGESIA_TIGRINA               |
| NCBMP | Macroinvert ENDOCHIRONOMUS_NIGRICANS      |
| NCBMP | Macroinvert CHAULIODES_RASTRICORNIS       |
| NCBMP | Macroinvert RHEOCRICOTOPUS_TUBERCULATUS   |
| NCBMP | Macroinvert SIMULIUM_VENUSTUM             |
| NCBMP | Macroinvert PSECTROCLADIUS_SORDIDELLUS_GR |
| NCBMP | Macroinvert TANYTARSUS_BUCKLEYI           |
| NCBMP | Macroinvert NILOTHAUMA_SPP                |
| NCBMP | Macroinvert SYRPHIDAE                     |
| NCBMP | Macroinvert MOOREOBDELLA_MELANOSTOMA      |
| NCBMP | Macroinvert PARAKIEFFERIELLA_SP_E         |
| NCBMP | Macroinvert RHEOCRICOTOPUS_GLABRICOLLIS   |
| NCBMP | Macroinvert OULIMNIUS_NITIDULUS           |
| NCBMP | Macroinvert ORTHOCLADIUS_ANNECTENS        |
| NCBMP | Macroinvert CHAOBORUS_SPP                 |
| NCBMP | Macroinvert PLACOBDELLA_PAPILLIFERA       |
| NCBMP | Macroinvert EUKIEFFERIELLA_SPP            |
| NCBMP | Macroinvert BITTACOMORPHA_CLAVIPES        |
| NCBMP | Macroinvert SLAVINA_APPENDICULATA         |
| NCBMP | Macroinvert MOLANNA_BLENDA                |
| NCBMP | Macroinvert MOLANNA_TRYPHENA              |
| NCBMP | Macroinvert DANNELLA_LITA                 |
| NCBMP | Macroinvert TRIAENODES_TAENIUS            |
| NCBMP | Macroinvert COELOTANYPUS_SPP              |
| NCBMP | Macroinvert EUKIEFFERIELLA_BREVICALCAR_GR |
| NCBMP | Macroinvert LIMNOPHILA_SPP                |
| NCBMP | Macroinvert PROMORESIA_SPP                |
| NCBMP | Macroinvert ORTHOCLADIUS_DENTIFER         |
| NCBMP | Macroinvert CYMBIODYTA_SPP                |

|       |                                         |
|-------|-----------------------------------------|
| NCBMP | Macroinvert CLADOTANYTARSUS_SP_F        |
| NCBMP | Macroinvert FORCIPOMYIA_SPP             |
| NCBMP | Macroinvert ORTHOCLADIUS_LIGNICOLA      |
| NCBMP | Macroinvert LIMNOPHYES_SPP              |
| NCBMP | Macroinvert HYDROCANTHUS_SPP            |
| NCBMP | Macroinvert DICROTENDIPES_SPP           |
| NCBMP | Macroinvert OMISUS_SPP                  |
| NCBMP | Macroinvert DANNELLA_PROVONSHAI         |
| NCBMP | Macroinvert CRICOTOPUS_SPP              |
| NCBMP | Macroinvert PELOCORIS_SPP               |
| NCBMP | Macroinvert NAIDIDAE                    |
| NCBMP | Macroinvert MICROPSECTRA_DIVES_GEMINATA |
| NCBMP | Macroinvert PLACOBDELLA_PARASITICA      |
| NCBMP | Macroinvert CAECIDOTEA_FORBESI          |
| NCBMP | Macroinvert XENOCHIRONOMUS_XENOLABIS    |
| NCBMP | Macroinvert GLOSSIPHONIIDAE             |
| NCBMP | Macroinvert ABLABESMYIA_PELEENSIS       |
| NCBMP | Macroinvert ENDOCHIRONOMUS_SUBTENDENS   |
| NCBMP | Macroinvert NANOCLADIUS_BRANCHICOLUS    |
| NCBMP | Macroinvert DEMICRYPTOCHIRONOMUS_SPP    |
| NCBMP | Macroinvert PSEUDUCHIRONOMUS_SPP        |
| NCBMP | Macroinvert PERITHEMIS_TENERA           |
| NCBMP | Macroinvert ELLIPTIO_SPP                |
| NCBMP | Macroinvert ORTHOCLADIUS_NIGRITUS       |
| NCBMP | Macroinvert PILARIA_SPP                 |
| NCBMP | Macroinvert SYNURELLA_SPP               |
| NCBMP | Macroinvert ZALUTSCHIA_SP_A             |
| NCBMP | Macroinvert CASSIDINIDEA_LUNIFRONS      |
| NCBMP | Macroinvert KIEFFERULUS_DUX             |
| NCBMP | Macroinvert CRICOTOPUS_FUGAX            |
| NCBMP | Macroinvert SPIROSPERMA_NIKOLSKYI       |
| NCBMP | Macroinvert PAGASTIA_ORTHOGONIA         |
| NCBMP | Macroinvert POLYPEDILUM_SPP             |
| NCBMP | Macroinvert CRICOTOPUS_SYLVESTRIS_GR    |

|       |                                             |
|-------|---------------------------------------------|
| NCBMP | Macroinvert LARSIA_SPP                      |
| NCBMP | Macroinvert TVETENIA_SPP                    |
| NCBMP | Macroinvert CAECIDOTEA_SP_1                 |
| NCBMP | Macroinvert CAECIDOTEA_LATICAUDATUS         |
| NCBMP | Macroinvert CRYPTOTENDIPES_SPP              |
| NCBMP | Macroinvert TRIAENODES_INJUSTUS             |
| NCBMP | Macroinvert UNIONIDAE                       |
| NCBMP | Macroinvert CLADOTANYTARSUS_VIRIDIVENTRIS   |
| NCBMP | Macroinvert EUKIEFFERIELLA_PSEUDOMONTANA_GR |
| NCBMP | Macroinvert TANYTARSUS_GIBBUS               |
| NCBMP | Macroinvert MACCAFFERTIUM_LENATI            |
| NCBMP | Macroinvert ABLABESMYIA_ANNULATA            |
| NCBMP | Macroinvert RANATRA_SPP                     |
| NCBMP | Macroinvert EUKIEFFERIELLA_BREHMI_GR        |
| NCBMP | Macroinvert POLYPEDILUM_TRIGONUS            |
| NCBMP | Macroinvert FATTIGIA_PELE                   |
| NCBMP | Macroinvert ORTHOCLADIUS_CLARKEI_GR         |
| NCBMP | Macroinvert RHEOPELOPIA_ACRA_GR             |
| NCBMP | Macroinvert TRIAENODES_OCHRACEUS            |
| NCBMP | Macroinvert PARACLADOPELMA_SPP              |
| NCBMP | Macroinvert ZAVRELIMYIA_SPP                 |
| NCBMP | Macroinvert TRIBELOS_SPP                    |
| NCBMP | Macroinvert SCIRTES_SPP                     |
| NCBMP | Macroinvert NATARSIA_SPP                    |
|       | NANOCLADIUS_CRASSICORNUS_CF_RECTIN          |
| NCBMP | Macroinvert ERVIS                           |
| NCBMP | Macroinvert ODONTOMESA_FULVA                |
| NCBMP | Macroinvert TVETENIA_SP_NC                  |
| NCBMP | Macroinvert TVETENIA_SP_GA                  |
| NCBMP | Macroinvert CAECIDOTEA_RACOVITZAI           |
| NCBMP | Macroinvert CLADOTANYTARSUS_CF_DAVIESI      |
| NCBMP | Macroinvert OULIMNIUS_LATIUSCULUS           |
| NCBMP | Macroinvert ANOPHELES_SPP                   |
| NCBMP | Macroinvert EUKIEFFERIELLA_GRACEI_GR        |

|       |                                               |
|-------|-----------------------------------------------|
| NCBMP | Macroinvert PERICHAETINE_OLIGOCHAETE          |
| NCBMP | Macroinvert HAPLOTAXIS_GORDIOIDES             |
| NCBMP | Macroinvert HELOBDELLA_STAGNALIS              |
| NCBMP | Macroinvert POTTHASTIA_CF_GAEDII              |
| NCBMP | Macroinvert ANISOCENTROPUS_PYRALOIDES         |
| NCBMP | Macroinvert PROSTOMA_GRAECENSE                |
| NCBMP | Macroinvert LABRUNDINIA_PILOSELLA             |
| NCBMP | Macroinvert STYLARIA_LACUSTRIS                |
| NCBMP | Macroinvert HELOBDELLA_TRISERIALIS            |
| NCBMP | Macroinvert OPTIOSERVUS_TRIVITTATUS           |
| NCBMP | Macroinvert SIGARA_SPP                        |
| NCBMP | Macroinvert RANATRA_BUENOI                    |
| NCBMP | Macroinvert NANOCLADIUS_SP_5                  |
| NCBMP | Macroinvert TABANUS_SPP                       |
| NCBMP | Macroinvert ORTHOCLADIUS_FRIGIDUS             |
| NCBMP | Macroinvert STENONEMA_FEMORATUM               |
| NCBMP | Macroinvert POTTHASTIA_LONGIMANA              |
|       | PARALAUTERBORNIELLA_NIGROHALTERALI            |
| NCBMP | Macroinvert S                                 |
| NCBMP | Macroinvert PROCAMBARUS_SPP                   |
| NCBMP | Macroinvert BRANCHIURA_SOWERBYI               |
| NCBMP | Macroinvert PSEUDOSUCCINEA_COLUMELLA          |
| NCBMP | Macroinvert LIMNODRILUS_SPP                   |
| NCBMP | Macroinvert SUBLETTEA_COFFMANI                |
| NCBMP | Macroinvert MICROTENDIPES_SPP                 |
| NCBMP | Macroinvert PARACHAETOCLADIUS_ABNOBAEUS       |
| NCBMP | Macroinvert PARATRICHOCLADIUS_SPP             |
| NCBMP | Macroinvert OPTIOSERVUS_SPP                   |
| NCBMP | Macroinvert ORTHOCLADIUS_LUTEIPES_THIENEMANNI |
| NCBMP | Macroinvert THIENEMANNIELLA_XENA              |
| NCBMP | Macroinvert LIBELLULA_SPP                     |
| NCBMP | Macroinvert MICROPSECTRA_POLITA               |
| NCBMP | Macroinvert ILYODRILUS_TEMPLETONI             |

|       |                                         |
|-------|-----------------------------------------|
| NCBMP | Macroinvert KIEFFERULUS_SPP             |
| NCBMP | Macroinvert RHEOCRICOTOPUS_SPP          |
| NCBMP | Macroinvert PALAEMONETES_SPP            |
| NCBMP | Macroinvert CLINOTANYPUS_SPP            |
| NCBMP | Macroinvert PACHYDIPLAX_LONGIPENNIS     |
| NCBMP | Macroinvert SAETHERIA_TYLUS             |
| NCBMP | Macroinvert EUKIEFFERIELLA_DEVONICA_GR  |
| NCBMP | Macroinvert PARATANYTARSUS_QUADRATUS_GR |
| NCBMP | Macroinvert ORTHOCLADIUS_SPP            |
| NCBMP | Macroinvert PARATANYTARSUS_LONGISTYLUS  |
| NCBMP | Macroinvert TRICHOCORIXA_SPP            |
| NCBMP | Macroinvert SYNORTHOCLADIUS_SPP         |
| NCBMP | Macroinvert MYSTACIDES_SEPULCHRALIS     |
| NCBMP | Macroinvert CAECIDOTEA_SP_3             |
| NCBMP | Macroinvert CHRYSOPS_SPP                |
| NCBMP | Macroinvert BERSUS_SPP                  |
| NCBMP | Macroinvert BRILLIA_SERA                |
| NCBMP | Macroinvert TANYTARSUS_SP_G_GR          |
| NCBMP | Macroinvert OLIGOSTOMIS_PARDALIS        |
| NCBMP | Macroinvert LOPESCLADIUS_SPP            |
| NCBMP | Macroinvert ENCHYTRAEDIAE               |
| NCBMP | Macroinvert NIXE_SPP                    |
| NCBMP | Macroinvert DICROTENDIPES_NERVOSUS      |
| NCBMP | Macroinvert TANYTARSUS_SP_M             |
| NCBMP | Macroinvert LABIOBAETIS_DARDANUS        |
| NCBMP | Macroinvert DICROTENDIPES_MODESTUS      |
| NCBMP | Macroinvert BRILLIA_SPP                 |
| NCBMP | Macroinvert MICROCYLLOEPUS_PUSILLUS     |
| NCBMP | Macroinvert CENTROPTILUM_SPP            |
| NCBMP | Macroinvert XYLOTOPUS_PAR               |
| NCBMP | Macroinvert PSEUDOLIMNOPHILA_SPP        |
| NCBMP | Macroinvert POLYPEDILUM_LAETUM          |
| NCBMP | Macroinvert ORTHOCLADIUS_DUBITATUS      |
| NCBMP | Macroinvert DIPLOCLADIUS_CULTRIGER      |

|       |                                          |
|-------|------------------------------------------|
| NCBMP | Macroinvert PRODIAMESA_OLIVACEA          |
| NCBMP | Macroinvert LABIOBAETIS_EPHIPPIATUS      |
| NCBMP | Macroinvert PLAUDITUS_CESTUS             |
| NCBMP | Macroinvert MACCAFFERTIUM_MEDIOPUNCTATUM |
| NCBMP | Macroinvert TRIAENODES_SPP               |
| NCBMP | Macroinvert PROBEZZIA_SPP                |
| NCBMP | Macroinvert PENELOMAX_SEPTENTRIONALIS    |
| NCBMP | Macroinvert CNEPHIA_ORNITHOPHILIA        |
| NCBMP | Macroinvert MICROPSECTRA_SPP             |
| NCBMP | Macroinvert PARATANYTARSUS_SPP           |
| NCBMP | Macroinvert CRICOTOPUS_INFUSCATUS_GR     |
| NCBMP | Macroinvert PTILOSTOMIS_SPP              |
| NCBMP | Macroinvert ORTHOCLADIUS_ROBACKI         |
| NCBMP | Macroinvert CAECIDOTEA_OBTUSUS           |
| NCBMP | Macroinvert STICTOCHIRONOMUS_SPP         |
| NCBMP | Macroinvert PARATANYTARSUS_DISSIMILIS    |
| NCBMP | Macroinvert NILOTANYPUS_FIMBRIATUS       |
| NCBMP | Macroinvert TANYTARSUS_SP_U              |
| NCBMP | Macroinvert TANYTARSUS_ALLICIS_BUCKLEYI  |
| NCBMP | Macroinvert PALPOMYIA_COMPLEX            |
| NCBMP | Macroinvert TANYTARSUS_SEPP              |
| NCBMP | Macroinvert NANOCLADIUS_SPP              |
| NCBMP | Macroinvert MICROPSECTRA_SP_A            |
| NCBMP | Macroinvert GLYPTOTENDIPES_SPP           |
| NCBMP | Macroinvert PROSIMULIUM_SPP              |
| NCBMP | Macroinvert DANNELLA_SPP                 |
| NCBMP | Macroinvert TANYTARSUS_MESSERSMITHI      |
| NCBMP | Macroinvert PHYLOCENTROPUS_SPP           |
| NCBMP | Macroinvert PHAENOPSECTRA_PUNCTIPES_GR   |
| NCBMP | Macroinvert DICROTENDIPES_SIMPSONI       |
| NCBMP | Macroinvert TRIBELOS_FUSCICORNE          |
| NCBMP | Macroinvert CRICOTOPUS_CF_PATENS         |
| NCBMP | Macroinvert BRANCHIOBDELLIDAE            |
| NCBMP | Macroinvert ERPOBDELLA_MOOREOBDELLA_SPP  |

|       |                                            |
|-------|--------------------------------------------|
| NCBMP | Macroinvert TANYTARSUS_SPP                 |
| NCBMP | Macroinvert SPERCHOPSIS_TESSELLATUS        |
| NCBMP | Macroinvert ROBACKIA_DEMEIJEREI            |
| NCBMP | Macroinvert MACCAFFERTIUM_MEXICANUM        |
| NCBMP | Macroinvert ORTHOCLADIUS_DORENUS           |
| NCBMP | Macroinvert NATARSIA_SP_A                  |
| NCBMP | Macroinvert MACCAFFERTIUM_CARLSONI         |
| NCBMP | Macroinvert ABLABESMYIA_RHAMPHE_GR         |
| NCBMP | Macroinvert POLYPEDILUM_TRITUM             |
| NCBMP | Macroinvert DIXELLA_SPP                    |
| NCBMP | Macroinvert MICROTENDIPES_RYDALENSIS_GR    |
| NCBMP | Macroinvert MACCAFFERTIUM_TERMINATUM       |
| NCBMP | Macroinvert PROMORESIA_TARDELLA            |
| NCBMP | Macroinvert SPHAERIUM_SPP                  |
| NCBMP | Macroinvert CRICOTOPUS_ANNULATOR_COMPLEX   |
| NCBMP | Macroinvert BEZZIA_PALPOMYIA_SPP           |
| NCBMP | Macroinvert TANYTARSUS_SP_L_GR             |
| NCBMP | Macroinvert PENTANEURA_INCONSPICUA         |
| NCBMP | Macroinvert TRIAENODES_PERNA_HELO          |
| NCBMP | Macroinvert TVETENIA_VITRACIES             |
| NCBMP | Macroinvert MUSCULIUM_SPP                  |
| NCBMP | Macroinvert GYRINUS_SPP                    |
| NCBMP | Macroinvert ORTHOCLADIUS_OBUMBRATUS_GR     |
| NCBMP | Macroinvert ORTHOCLADIUS_CARLATUS          |
| NCBMP | Macroinvert LAEVAPEX_FUSCUS                |
| NCBMP | Macroinvert DIAMESA_SPP                    |
| NCBMP | Macroinvert PROCLADIUS_SPP                 |
|       |                                            |
| NCBMP | Macroinvert STEGOPTERNA_MUTATA_DIPLOMUTATA |
| NCBMP | Macroinvert CRICOTOPUS_VIERRIENSIS_GR      |
| NCBMP | Macroinvert POLYPEDILUM_HALTERALE_GR       |
| NCBMP | Macroinvert HYDROBAENUS_SPP                |
| NCBMP | Macroinvert PARATENDIPES_ALBIMANUS         |
| NCBMP | Macroinvert MACCAFFERTIUM_EXIGUUM          |

|       |                                           |
|-------|-------------------------------------------|
| NCBMP | Macroinvert HYDROBIIDAE                   |
| NCBMP | Macroinvert PELTODYTES_SPP                |
| NCBMP | Macroinvert IRONOQUIA_PUNCTATISSIMA       |
| NCBMP | Macroinvert GAMMARUS_SPP                  |
| NCBMP | Macroinvert CARDIOCLADIUS_OBSCURUS        |
| NCBMP | Macroinvert LIMNODRILUS_HOFFMEISTERI      |
| NCBMP | Macroinvert TUBIFICIDAE                   |
| NCBMP | Macroinvert NANOCLADIUS_DOWNESI           |
| NCBMP | Macroinvert DICROTENDIPES_NEOMODESTUS     |
| NCBMP | Macroinvert LIRCEUS_SPP                   |
| NCBMP | Macroinvert MENETUS_DILATATUS             |
| NCBMP | Macroinvert PALAEMONETES_PALUDOSUS        |
| NCBMP | Macroinvert BRILLIA_FLAVIFRONS            |
| NCBMP | Macroinvert LEPTOXIS_SPP                  |
| NCBMP | Macroinvert CORYNONEURA_SPP               |
| NCBMP | Macroinvert HELISOMA_ANCEPS               |
| NCBMP | Macroinvert EUKIEFFERIELLA_CLARIPENNIS_GR |
| NCBMP | Macroinvert OPTIOSERVUS_OVALIS            |
| NCBMP | Macroinvert ANCHYTARSUS_BICOLOR           |
| NCBMP | Macroinvert STENOCHIRONOMUS_SPP           |
| NCBMP | Macroinvert PISIDIUM_SPP                  |
| NCBMP | Macroinvert PROCLOEON_SPP                 |
| NCBMP | Macroinvert CAMBARUS_SPP                  |
| NCBMP | Macroinvert CAMPELOMA_DECISUM             |
| NCBMP | Macroinvert RHEOCRICOTOPUS_ROBACKI        |
| NCBMP | Macroinvert ORTHOCLADIUS_OLIVERI          |
| NCBMP | Macroinvert PHAENOPSECTRA_OBEDIENS_GR     |
| NCBMP | Macroinvert CRANGONYX_SERRATUS            |
| NCBMP | Macroinvert HYALELLA_SPP                  |
| NCBMP | Macroinvert LABIOBAETIS_FRONDALIS         |
| NCBMP | Macroinvert POLYPEDILUM_FALLAX_SP_A       |
| NCBMP | Macroinvert DUBIRAPHIA_SPP                |
| NCBMP | Macroinvert NAIS_SPP                      |
| NCBMP | Macroinvert PLATYHELMINTHES               |



|       |                                         |
|-------|-----------------------------------------|
| NCBMP | Macroinvert MACCAFFERTIUM_MERIRIVULANUM |
| NCBMP | Macroinvert PROMORESIA_ELEGANS          |
| NCBMP | Macroinvert NEOEPHEMERA_PURPUREA        |
| NCBMP | Macroinvert POLYPEDILUM_SCALAENUM_GR    |
| NCBMP | Macroinvert CRANGONYX_SPP               |
| NCBMP | Macroinvert HEXATOMA_SPP                |
| NCBMP | Macroinvert MACCAFFERTIUM_SPP           |
| NCBMP | Macroinvert ISWAEON_ANOKA               |
| NCBMP | Macroinvert THIENEMANNIELLA_SPP         |
| NCBMP | Macroinvert CRYPTOCHIRONOMUS_SPP        |
| NCBMP | Macroinvert DIXA_SPP                    |
| NCBMP | Macroinvert ANCYRONYX_VARIEGATUS        |
| NCBMP | Macroinvert ABLABESMYIA_MALLOCHI        |
| NCBMP | Macroinvert CRICOTOPUS_BICINCTUS        |
| NCBMP | Macroinvert MICROTENDIPES_PEDELLUS_GR   |
| NCBMP | Macroinvert CHIRONOMUS_SPP              |
| NCBMP | Macroinvert ANTOCHA_SPP                 |
| NCBMP | Macroinvert CAECIDOTEA_SPP              |
| NCBMP | Macroinvert TVETENIA_BAVARICA_GR        |
| NCBMP | Macroinvert FERRISSIA_SPP               |
| NCBMP | Macroinvert DICRANOTA_SPP               |
| NCBMP | Macroinvert HYDRACARINA                 |
| NCBMP | Macroinvert MEGADRILE_OLIGOCHAETE       |
| NCBMP | Macroinvert NEOPORUS_SPP                |
| NCBMP | Macroinvert PHYSA_SPP                   |
| NCBMP | Macroinvert LABIOBAETIS_PROPINQUUS      |
| NCBMP | Macroinvert TRIBELOS_JUCUNDUM           |
| NCBMP | Macroinvert POLYPEDILUM_AVICEPS         |
| NCBMP | Macroinvert POLYPEDILUM_ILLINOENSE_GR   |
| NCBMP | Macroinvert DINEUTUS_SPP                |
| NCBMP | Macroinvert PARAMETRIOCNEMUS_SPP        |
| NCBMP | Macroinvert CORBICULA_FLUMINEA          |
| NCBMP | Macroinvert RHEOTANYTARSUS_SPP          |
| NCBMP | Macroinvert CAMBARIDAE                  |

|       |                                    |
|-------|------------------------------------|
| NCBMP | Macroinvert POLYPEDILUM_FLAVUM     |
| NCBMP | Macroinvert MACCAFFERTIUM_ITHACA   |
| NCBMP | Macroinvert MACRONYCHUS_GLABRATUS  |
| NCBMP | Macroinvert TIPULA_SPP             |
| NCBMP | Macroinvert STENELMIS_SPP          |
| NCBMP | Macroinvert PLAUDITUS_DUBIUS_GR    |
| NCBMP | Macroinvert LUMBRICULIDAE          |
| NCBMP | Macroinvert TELOGANOPSIS_DEFICIENS |
| NCBMP | Macroinvert MACCAFFERTIUM_PUDICUM  |
| NCBMP | Macroinvert ELIMIA_SPP             |
| NCBMP | Macroinvert THIENEMANNIMYIA_GR     |
| NCBMP | Macroinvert TRIAENODES_IGNITUS     |
| NCBMP | Macroinvert TALLAPERLA_SPP         |
| NCBMP | Macroinvert SIMULIUM_SPP           |
| NCBMP | Macroinvert MACCAFFERTIUM_MODESTUM |
